# The MksG nuclease is the executing part of the bacterial plasmid defense system MksBEFG

Manuela Weiß<sup>1</sup>, Giacomo Giacomelli<sup>1,†</sup>, Mathilde Ben Assaya<sup>2,†</sup>, Finja Grundt<sup>1</sup>, Ahmed Haouz<sup>3</sup>, Feng Peng<sup>1</sup>, Stéphanie Petrella<sup>2</sup>, Anne Marie Wehenkel<sup>2</sup> and Marc Bramkamp<sup>1,4,\*</sup>

<sup>1</sup>Institute for General Microbiology, Christian-Albrechts-University Kiel, Am Botanischen Garten 1-9, 24118 Kiel, Germany, <sup>2</sup>Unité de Microbiologie Structurale, Institut Pasteur, CNRS, Université Paris Cité, 75015 Paris, France, <sup>3</sup>Plate-forme de Cristallographie, C2RT, Institut Pasteur, CNRS UMR 3528, F-75015 Paris, France and <sup>4</sup>Central Microscopy Facility, Christian-Albrechts-University Kiel, Am Botanischen Garten 1-9, 24118 Kiel, Germany

Received October 11, 2022; Revised February 03, 2023; Editorial Decision February 06, 2023; Accepted February 10, 2023

## ABSTRACT

Cells are continuously facing the risk of taking up foreign DNA that can compromise genomic integrity. Therefore, bacteria are in a constant arms race with mobile genetic elements such as phages, transposons and plasmids. They have developed several active strategies against invading DNA molecules that can be seen as a bacterial ‘innate immune system’. Here, we investigated the molecular arrangement of the *Corynebacterium glutamicum* MksBEFG complex, which is homologous to the MukBEF condensin system. We show here that MksG is a nuclease that degrades plasmid DNA. The crystal structure of MksG revealed a dimeric assembly through its C-terminal domain that is homologous to the TOPRIM domain of the topoisomerase II family of enzymes and contains the corresponding ion binding site essential for DNA cleavage in topoisomerases. The MksBEF subunits exhibit an ATPase cycle *in vitro* and we reason that this reaction cycle, in combination with the nuclease activity provided by MksG, allows for processive degradation of invading plasmids. Super-resolution localization microscopy revealed that the Mks system is spatially regulated via the polar scaffold protein DivIVA. Introduction of plasmids results in an increase in DNA bound MksG, indicating an activation of the system *in vivo*.

## INTRODUCTION

Exchange of genetic material is an ubiquitous process. In prokaryotic organisms, horizontal gene transfer (HGT) is the major source of genetic exchange and recombination.

Therefore, HGT contributes greatly to the evolution and adaptation of prokaryotic organisms (1). HGT is driven by three routes of DNA transfer: virus (phage) infection, conjugation and transformation. The uptake of foreign DNA is usually associated with a fitness burden and can, in case of phage infection, result in the death of the host cell. Thus, in an attempt to protect their genetic integrity, bacteria are in a permanent arms race with phages and other invading DNA molecules (2). Consequently, bacteria have evolved a multitude of active defense systems, which collectively comprise the bacterial ‘innate immune system’ (3). Among the systems preventing entry of foreign DNA, anti-phage systems are predominant. Classical phage defense strategies include restriction-modification (R-M) systems and abortive infection systems (Abi). These systems are usually organized in ‘defense islands’ (4,5). Based on this genomic organization, other phage defense systems have been uncovered in recent years. Among those are BREX (6), gasdermins (7), TIR-domain systems (8), dynamin-like proteins (9) and DISARM (10).

So far, less diversity has been observed for plasmid defense systems, with well-known systems such as restriction endonucleases, CRISPR-Cas (11) and prokaryotic argonautes (pAgos) (12) being the main representatives. Recently, a plasmid resistance system centered around a condensin-like ATPase complex was identified bioinformatically in a large genomic screen (4). The system, termed Wadjet, includes four genes (*jetABCD*). JetABC are homologs of condensin complexes MukFEB, respectively. Transplantation of the four genes system into *Bacillus subtilis* led to a reduced transformation efficiency in this heterologous setting (4). In strong agreement with these findings, we have previously shown that in the Gram-positive bacterium *Corynebacterium glutamicum* the MksBEFG system (a Wadjet type I system) is indeed involved in plasmid copy number control (13). Deletion of the condensin

\*To whom correspondence should be addressed. Tel: +49 0 431 880 4341; Fax: +49 0 431 880 2198; Email: bramkamp@ifam.uni-kiel.de

†These authors contributed equally.

subunit MksB (Cg3104) leads to a large increase in the plasmid copy number in *C. glutamicum*. MksB (homolog of JetC) is part of a larger family of ATPase's that are often involved in chromosome organization and DNA repair (13). The best studied prokaryotic condensin proteins are structural maintenance of chromosome (Smc) and the functionally related MukB protein. While *Escherichia coli* and other gammaproteobacteria encode a MukB-dependent system (14), many Gram-positive bacteria as well as eukaryotes use the Smc variant (15). Smc and MukB act in concert with a kleisin protein (MukF in *E. coli* and ScpA in *B. subtilis* and *C. glutamicum*) and a kite protein (MukE and ScpB, respectively) and play a role in chromosome condensation and segregation (16–21). Interestingly, several bacteria harbor homologs of both systems and for long it remained unclear if both work on chromosome organization (22,23). We have shown that while Smc in *C. glutamicum* is involved in chromosome inter-arm cohesion, MksB had no effect on chromosome organization. However, we described an effect of MksB on plasmid copy number, indicating that MksB functions exclusively in plasmid defense and/or control of plasmid copy number (13). These findings are in line with earlier observations in *Mycobacterium smegmatis*. The transformable laboratory strain *M. smegmatis* mc<sup>2</sup>155 carries a spontaneous mutation in an MksB homolog (termed EptC), while presence of EptC leads to restriction of plasmids (24).

Unlike the classical condensin systems the Mks system from *C. glutamicum* contains a fourth subunit, MksG (cg3103). MksG has been predicted to have structural homology with topoisomerase VI (Topo VI). Topo VI is a heterotetrameric complex that identifies DNA crossings and uses ATP hydrolysis to open the DNA and allow strand passing (25,26). The structures of a topo VI have been solved for the enzyme from *Sulfolobus shibatae* (25) and *Methanocaldococcus jannaschii* (26). Interaction between SMC complexes and topoisomerases is actually common. For example, MukB is required for correct Topo IV localization and activity in Gram-negative bacteria (27–30). So far, the mechanism of the condensin-like plasmid defense systems has not been analyzed. We, therefore, set out to characterize the molecular mechanism of the MksBEFG system from *C. glutamicum* in detail. Our data reveal that MksG is a novel, divalent cation-dependent nuclease that effectively cleaves DNA *in vitro* in an ATP independent manner. Structural analysis of MksG showed that MksG forms a dimer and shares similarities in its catalytic site with the TOPRIM domain of topoisomerase VI. However, MksG differs from Topo VI with respect to the 5Y-CAP and the catalytic tyrosine. MksG activity is not dependent on MksBEF, but ATPase activity of the MksBEF complex is reduced in presence of MksG. The MksBEFG complex is localized to the cell poles in *C. glutamicum*. Single molecule tracking revealed that MksB is mainly confined at the cell pole with an additional slow diffusive population. In contrast, MksG is present in three distinct populations: an 'immobile' population that comprises both DNA bound and polarly anchored MksG and two dynamic populations (one 'slow' and one 'fast') across the nucleoid and the cytosol. Presence of plasmid DNA directly changes MksG molecular dynamics. Polar localization of MksG is altered by Mks-

BEF, that in turn colocalizes with DivIVA. Depletion of the polar scaffold DivIVA abolishes MksB localization. Thus, the MksBEFG complex is localized to a region outside the bulk of the chromosomal DNA, either to reduce the risk of aberrant cleavage of chromosomal DNA or to increase the chances for plasmid encounter. Our data reveal that the plasmid defense mechanism by MksBEFG is executed by the MksG nuclease activity. It also provides evidence for the evolutionary connection for the interactions between MksB/MukB and topoisomerase proteins. Biotechnologically, our findings are important for the generation of *C. glutamicum* strains with improved plasmid replication properties.

## MATERIAL AND METHODS

### Bacterial strains, plasmids and oligonucleotides

**Cloning.** Strains, plasmids and oligonucleotides used in this study are listed in Supplementary Tables S1–3. Correct plasmid construction was controlled by DNA sequencing (Eurofins). *E. coli* NEB5 $\alpha$  or *E. coli* NEB Turbo were used for cloning plasmids.

For heterologous protein expression, genes of interest (cg3103-cg3106) were amplified using polymerase chain reaction (PCR), digested with respective enzymes and ligated into pET28a (+) vector. Genes *mksF* (cg3106) *mksE* (cg3105) *mksG* (cg3103) were amplified using oligonucleotides MG045/MG046, MG047/MG048 and MG051/MG052, respectively, from genomic DNA and resulting amplicons were digested with NdeI/BamHI-HF. Digested fragments were ligated into digested pET28a-vector resulting in plasmids pMG001, pMG002 and pMG003. Vector pET16b and gene *mksB* (cg3103) were amplified using primer pair MG093/MG094 and MG095/MG096, respectively, and cloned using the Gibson Assembly Mastermix (NEB), resulting in plasmid pMG004. Primers were designed using <https://nebuilder.neb.com/>. For the MksB hydrolysis mutant (MksB<sup>E1042Q</sup>), a site-directed mutagenesis (Q5 site-directed mutagenesis Kit, NEB) was performed using primer pair MG060/MG061 and pMG004 as template, resulting in plasmid pMG005.

In order to generate the MksG mutants (MksG<sup>E236A</sup>, MksG<sup>D279A</sup>, MksG<sup>Y258A</sup>, MksG<sup>Y276A</sup>), site-directed mutagenesis (Q5 site-directed mutagenesis Kit, NEB) was performed, using primer pairs MG127/MG128, MG129/MG130, MG139/MG140 and MG141/MG142, respectively, and plasmid pMG003 was used as template resulting in plasmids pMG006, pMG007, pMG017 and pMG018.

Derivatives of the suicide integration vector pK19mobsacB were used for clean knockouts and allelic replacements in *C. glutamicum*, containing the modified genomic region interest including its 500 bp up- and downstream homologous flanking sequences. In order to construct pMG009 primer pairs, MG064/MG065 and MG066/MG067 were used to amplify the 500 bp up- and downstream regions. The two fragments were used as a template for an overhang-PCR yielding in an 1000 bp fragment, which was then digested with HindIII-HF and EcoRI-HF and subsequently ligated into digested pK19mobsacB vector. To construct pMG010 primer

pairs MG080/MG081 and MG082/MG083 were used to amplify the 500 bp up- and downstream regions. The two fragments were used as a template for an overhang-PCR yielding in an 1000 bp fragment, which was then digested with XbaI and EcoRI-HF and subsequently ligated into digested pK19mobsacB vector. In order to construct pMG011 primer pairs MG084/MG085 and MG086/MG087 were used to amplify the 500 bp up- and downstream regions. The two fragments were used as a template for an overhang-PCR yielding in an 1000 bp fragment, which was then digested with HindIII-HF and EcoRI-HF and subsequently ligated into digested pK19mobsacB vector.

To construct a C-terminal tagged fusion proteins with Halo-Tag for an allelic replacement in *C. glutamicum* the Gibson Assembly technique was used. Primers were designed using <https://nebuilder.neb.com/>. Four fragments for each plasmid were amplified to generate plasmids pMG012-15. To amplify the pK19mobsacB backbone the primer pair MG097/MG098 was used for all plasmid derivatives (fragment 1). As a template for the Halo-Tag gene plasmid pK19mobsacB *parB*-Halo (Dr G. Giacomelli, laboratory stock) was used. For plasmid pMG012 further three fragments were generated using primer pairs MG099/MG100, MG101/MG102 and MG103/MG104. For plasmid pMG013 further three fragments were generated using primer pairs MG105/MG106, MG107/MG108 and MG109/MG110. For plasmid pMG014 further three fragments were generated using primer pairs MG111/MG112, MG113/MG114 and MG115/MG116. For plasmid pMG015 further three fragments were generated using primer pairs MG117/MG118, MG119/MG120 and MG121/MG122.

Plasmid pMG016 was constructed by amplifying the *mksG* gene using primer pair MG089/MG090. Generated fragment was digested with HindIII and SalI and ligated into pXMJ19 vector.

**Strain construction.** Strains EMG007, EMG008, EMG009, EMG049 and EMG051, and EMG053 were obtained by transforming plasmids pMG002, pMG001, pMG003, pMG006, pMG007 and pMG008 into chemical competent *E. coli* BL21 (DE3) pLysS cells. Strains EMG035 and EMG041 were obtained by transforming plasmids pMG004 and pMG005 into chemical competent *E. coli* Rosetta (DE3) pLysS cells.

Vectors were transformed via electroporation into *C. glutamicum* MB001 cells (31). Genomic integration of pK19mobsacB plasmids were selected on kanamycin, whereas the second cross-over event was confirmed by growth on 10% sucrose. Screening of allelic replacements in *C. glutamicum* was confirmed by colony PCR. Strains CMG004, CMG005, CMG011 were generated by electroporation plasmids pMG009, pMG010 and pK19mobsacB  $\Delta$ *mksB* into strain MB001. In order to obtain the strain  $\Delta$ *mksG*, plasmid pMG011 was first electroporated and integrated into the MB001 genome. Second, plasmid pMG016 was transformed into the same strain. MksG expression from pXMJ19 plasmid was induced by 1 mM Isopropyl- $\beta$ -D-1-thiogalactopyranoside (IPTG). Once the second cross-over was confirmed (resulting in  $\Delta$ *mksG*) by colony PCR,

the cells were further grown in Brain Heart Infusion medium (BHI medium) and selected until plasmid pMG016 was lost again, resulting in strain CMG006.

To obtain strains CMG012, and CMG018 plasmid pMG012 was transformed into MB001 and CMG011. To obtain strains CMG013, CMG014 and CMG015 plasmids pMG013, pMG014 and pMG015 were transformed into MB001 cells.

Plasmid pBHK18 was transformed into MB001, CMG011, CMG012, CMG018, CMG004, CMG006 to generate strains CMG007, CMG023, CMG032, CMG034, CMG041 and CMG046, respectively. Plasmid pJC1 was transformed into MB001, CMG012, CMG018, CMG011, CMG004, CMG006 to generate strains CMG010, CMG033, CMG035, CMG038, CMG042 and CMG046, respectively.

The pSG-dCas9-sgRNA-*divIVA* plasmid was transformed into strain CBK114 to obtain CPF009.

For recombinant protein production in *E. coli* MksG was amplified from pMG003 using primers P1 and P2 and sub-cloned by Gibson Assembly into a pET28 derivative vector containing an N-terminal 6xHis-SUMO tag using primers P3 and P4. All plasmids were verified by Sanger sequencing (Eurofins Genomics, France).

### DivIVA depletion using the CRISPRi system

DivIVA was depleted as previously described by Giacomelli *et al.* (32). *C. glutamicum* cells were grown at 30°C, at 200 rpm in BHI medium for an overnight culture. The next day, cells were diluted to an OD<sub>600</sub> of 0.3 in fresh BHI and grown for approximately 3 h (OD<sub>600</sub> = 3). DivIVA was depleted (CPF009) by supplementing the bacterial culture with 0.2 mM IPTG for 3 h.

### Plasmid extraction from *C. glutamicum*

Plasmid extraction was performed as previously described by Böhm *et al.* (13). *C. glutamicum* cells were grown in 10 ml BHI medium to exponential growth phases (~5 h) in presence of selection antibiotic, following incubation with 20 mg/ml lysozyme in A1 buffer (NucleoSpin® Plasmid Kit, Macherey-Nagel) overnight at 30°C. Subsequently, plasmids were extracted using the plasmid kit according to manufacturer's instruction.

### Genomic DNA extraction

*C. glutamicum* cells were grown in 10 ml BHI medium to exponential growth phase in presence of selection antibiotic (where necessary). Samples were adjusted to an OD<sub>600</sub> of 16 per ml. Cell pellets were frozen and stored at -20°C overnight. DNA extraction was performed with Microbial DNA kit (Macherey Nagel), according to the manufacturer's instructions.

### Real-time PCR

DNA amplification was performed using 2x qPCR Mastermix SYBR blue (GeneON, Y220) according to the manufacturer's manual, where reaction volumes of 25  $\mu$ l contained 200 nM oligonucleotides and 10  $\mu$ l of diluted DNA,

respectively. Samples were measured in technical triplicates via an AriaMx and  $C_t$  values were determined using the Agilent Aria Software 1.8v. Primer efficiencies were estimated by calibration dilution curves and slope calculation (33); data were analyzed by  $2^{-\Delta C_T}$  method (34) accounting for dilution factors and sample volumes used for DNA purification. Same primers were used as mentioned by Böhm *et al.* (13).

### Protein purification

Heterologous expression of His<sub>6</sub>-MksE and His<sub>6</sub>-MksG was performed in *E. coli* strains EMG007 and EMG009, respectively, in LB-medium containing the appropriate antibiotics [Kanamycin 50  $\mu\text{g ml}^{-1}$  Chloramphenicol 34  $\mu\text{g ml}^{-1}$ ]. An IPTG concentration of 1 mM was added at an optical density at 600 nm of  $\sim 0.6$  to induce protein expression. Cells were grown for 3–4 h at 37°C.

Heterologous expression of His<sub>6</sub>-MksF, His<sub>10</sub>-MksB and His<sub>10</sub>-MksB<sup>E1042Q</sup> was performed in *E. coli* strains EMG008, EMG035 and EMG041, respectively, in LB-medium containing the appropriate antibiotics [kanamycin 50  $\mu\text{g ml}^{-1}$  or carbenicillin 100  $\mu\text{g ml}^{-1}$  and chloramphenicol 34  $\mu\text{g ml}^{-1}$ ]. An IPTG concentration of 0.5 mM was added at an optical density at 600 nm of 0.6–0.9 to induce protein expression at 18°C. Cells were grown for  $\sim 16$  h.

The cultures were harvested at 6500 rcf for 15 min at 4°C. Cell pellets were frozen and stored at  $-80^\circ\text{C}$  until needed.

Cell pellets were resuspended in cold Buffer IMAC [50 mM Tris-HCl, pH 8.5, 0.5 M NaCl, 10 mM MgCl<sub>2</sub>, 10% glycerol] and supplemented with 15 mM Imidazole, a pinch of lyophilized DNaseI and Protease Inhibitor Cocktail (cOmplete™, EDTA-free Protease Inhibitor Cocktail, Roche 04693132001). The homogeneous suspension was passed through a French Pressure cell (Amico) in order to disrupt the cells. The solution was passed through three times at 20 000 psi inner cell pressure. The suspension was centrifuged at 10 000 rpm at 4°C in Beckman Coulter Avanti J-25 Centrifuge using the JA-10 rotor with falcon adapters to eliminate cell debris. The supernatant was transferred to a fresh falcon and directly used for immobilized metal affinity chromatography (IMAC) using the Äktapure25 system with a sample pump (Cytiva) and 1 ml Ni-NTA columns (Macherey-Nagel). Proteins were concentrated where necessary using Amicon filter devices with appropriate molecular weight cut-off (Millipore; Merck).

For MksE, MksF, MksG, MksG<sup>E236A</sup>, MksG<sup>D279A</sup>, MksG<sup>Y258A</sup> and MksG<sup>Y276A</sup> purifications, size-exclusion chromatography followed using Superdex200 Increase 10/300 GL (Cytiva) and fractions were pooled and concentrated snap frozen and stored at  $-80^\circ\text{C}$  or directly used for the assays. Purifying MksE and MksF together yielded in cleaner protein fractions. However, it was not possible to separate the two proteins via size-exclusion or anion-exchange chromatography.

For MksB and MksB<sup>E1042Q</sup> purifications, fractions after IMAC were diluted in Buffer without NaCl to an end concentration of  $\sim 150$  mM NaCl and chromatographed using Heparin HiTrap HP column (5 ml) (Cytiva) and resulted in a sharp peak at 300 mM NaCl. The fractions were pooled and concentrated and chromatographed with SEC Buffer

[50 mM Tris-HCl, pH 8.5, 0.5 M NaCl, 10 mM MgCl<sub>2</sub>, 1 mM Dithiothreitol (DTT), 5% glycerol] using Superdex200 Increase 10/300 GL or Superose6 Increase 10/300 GL (Cytiva). Peak fractions were pooled, concentrated, snap frozen and stored at  $-80^\circ\text{C}$  or directly used for the assays. Protein purities were analyzed via SDS-PAGE using 8–12% polyacrylamide gels and Western blotting using Penta-His antibody (QIAGEN).

### Protein expression and purification for crystallization

N-terminal 6xHis-SUMO-tagged constructs were expressed in *E. coli* BL21 C41 following an autoinduction protocol. After 4 h at 37°C, cells were grown for 20 h at 20°C in 2YT complemented autoinduction medium (35) containing 50  $\mu\text{g ml}^{-1}$  Kanamycin. Cells were harvested and flash frozen in liquid nitrogen. Cell pellets were resuspended in lysis buffer (50 mM TRIS-HCl pH 8.0, 5 mM NaCl, 5% glycerol, 1 mM MgCl<sub>2</sub>, benzonase, lysozyme, EDTA-free protease inhibitor cocktails (ROCHE)) at 4°C and lysed using a CF Disruptor cell disintegrator system (CellD.com). The lysate was centrifuged (13 000 rpm) for 1 h at 4°C, and the supernatant was loaded onto a Ni-NTA affinity chromatography column (HisTrap FF crude, Cytiva) pre-equilibrated in buffer A (50 mM TRIS-HCl pH 8.0, 500 mM NaCl, 5% glycerol, 10 mM imidazole). His-tagged proteins were eluted with a linear gradient of buffer B (50 mM TRIS-HCl pH 8.0, 500 mM NaCl, 5% glycerol, 1 M imidazole). The fractions of interest were pooled and dialyzed at 4°C overnight in SEC buffer (20 mM TRIS-HCl, pH 9.0, 500 mM NaCl, 5% glycerol). The protein was concentrated and loaded onto a Superdex 200 16/60 size exclusion column (GE Healthcare) pre-equilibrated at 4°C in SEC buffer. The peak corresponding to the protein was concentrated, flash frozen in liquid nitrogen and stored at  $-80^\circ\text{C}$ . Purity was verified by sodium dodecyl sulfate–polyacrylamide gel electrophoresis (SDS-PAGE).

### Crystallization

Initial screening of crystallization conditions was carried out by the vapor diffusion method using a Mosquito™ nanoliter-dispensing system (TTP Labtech, Melbourne, UK) following established protocols (36). MksG has a high propensity to crystallize however the diffraction properties are very poor, very likely due to the flexibility between the C- and N-ter domains. The best crystals of MksG (20 mg ml<sup>-1</sup>) were obtained after 3 days in 10% (w/v) PEG 6K, 30% (v/v) ethanol and 10 mM sodium acetate. Crystals were cryoprotected in crystallization solution supplemented by 30% (v/v) of ethylene glycol before flash freezing in liquid nitrogen.

### Data collection, structure determination and refinement

X-ray diffraction data were collected at 100 K at the PROX-IMA 1 beamline of the SOLEIL Synchrotron (Saint-Aubin, France). The dataset was processed using XDS (37) and AIMLESS from the CCP4 suite (38) (see Supplementary Table S1). Merged data were further subjected to anisotropy

correction with STARANISO (39), the elliptical diffraction limits were  $d_{h00} = 5.3 \text{ \AA}$ ,  $d_{0k0} = 4.3 \text{ \AA}$ ,  $d_{00l} = 4.3 \text{ \AA}$ . The structure was solved by molecular replacement methods, using Phaser from the CCP4 suite, with the individual N- and C-terminal domains generated by AlphaFold2 as search models. The structures were refined through iterative cycles of manual model building with COOT (40) and reciprocal space refinement with PHENIX (41) or BUSTER (42). Non-crystallographic symmetry and secondary structure restraints were applied. The final refinement statistics are shown in Supplementary Table S4 and a representative view of the final electron density map is shown in Supplementary Figure S1B. Structural figures were generated with ChimeraX (43).

### AlphaFold prediction and structure-based analysis

A structural model of MksG was calculated using AlphaFold2 (44) installed on local servers (Supplementary Figure S1A). The structural homology search was performed against the AlphaFold database on a local installation of DaliLite (45).

### Electrophoretic mobility shift assay

DNA-MksB/ DNA-MksG/ DNA-MksEF binding was assayed by using purified protein and circular plasmid DNA (pJC1 or pBHK18), PCR-amplified (pK19mobsacB) linear double-stranded DNA or single-stranded DNA (49 bp oligonucleotide, MG105). About 0–10  $\mu\text{g}$  of protein were incubated with 200 ng of linear or circular plasmid DNA or 30  $\mu\text{M}$  ssDNA for 30 min at 30°C in Buffer: 20 mM Tris-HCl, pH 8.5, 50 mM NaCl, 10 mM  $\text{MgCl}_2$ . Samples were separated on 0.7 % agarose gels at 4 V/cm for 2.5 h (with 5 $\times$  Nucleic acid buffer: 50mM Tris-HCl, pH 8.5, 25 % glycerol, 5 mM EDTA, 0.2 % bromophenol blue, 0.2 % xylene cyanole FF) in TAE (Tris base, acetic acid and EDTA) buffer. After separation, agarose gels were stained in GelRed or ethidium bromide.

### Cleavage assays

Nicking Assays were performed as described by Xiong *et al.* (46). The reaction contained 30 ng/ $\mu\text{l}$  plasmid DNA (pBHK18 or pJC1) (extracted from *C. glutamicum*  $\Delta\text{mksB}$  strain [CMG011]) in 50 mM potassium acetate, 20 mM Tris-acetate (pH 7.9), 10 mM metal ions/ EDTA, 0.1 mg  $\text{ml}^{-1}$  bovine serum albumin (BSA) and 10  $\mu\text{M}$  MksG (equals 5  $\mu\text{M}$  dimeric MksG). The reactions were incubated at 30°C and samples were taken after 0.5, 1 and 3 h. The reaction was stopped by adding 6x Purple DNA-Loading dye (NEB) and boiled at 90°C for 5 min. Samples were stored at 20°C until run on a 0.7–1% agarose gels in TAE at 6 V/cm for 1.5 h. DNA was post-stained with GelRed or ethidium bromide.

### ATP hydrolysis assays

ATP hydrolysis was analyzed in continuous reactions using the EnzChek Phosphate Assay Kit (E-6646, Molecular

Probes Inc.), according to the manufacturer's manual. Reaction volumes were reduced to 100  $\mu\text{l}$  and assayed in flat-bottom 96-well plates (Greiner-UV-Star 96-well plates). Reactions were measured at 30°C continuously every minute over a time-course of 3 h in a Tecan Infinite 200 Pro with the Software Tecan i-control v.2.0. The reactions contained 4  $\mu\text{M}$  of MksB or MksB<sup>E1042Q</sup> (equals 2  $\mu\text{M}$  dimeric MksB) as well as the additional subunits (unless stated otherwise), 2 mM Mg-ATP (Mg-ATP solution was prepared as a 20 mM stock, buffered in 20 mM Tris pH 7–8, 20 mM  $\text{Na}_2\text{-ATP}$ , 20 mM  $\text{MgCl}_2$ ) (unless stated otherwise) and 50 ng  $\mu\text{l}^{-1}$  plasmid DNA (pBHK18) where indicated. Before starting the reactions with 2 mM Mg-ATP, the reactions were preincubated for 10 min in order to eliminate phosphate contamination. Data were first analyzed with Excel (normalized, subtraction of ATP auto hydrolysis and subtraction of no substrate control, a linear regression was used to determine the hydrolysis rate per minute. Data visualization and further analysis was performed with GraphPad Prism version 5.03 for Windows, (GraphPad Software).

### Bio-layer interferometry

Measurements were performed on the BLItz platform (Sartorius) using Streptavidin (SA) Biosensors (Sartorius, 18–5019). The BLItz device was operated with the Software BLItz Pro (version 1.3.1.3) using the Advanced Kinetics Protocol modified as shown in Supplementary Table S5.

Beforehand, bait proteins were biotinylated (ratio 3:1) using the EZ-Link NHS-PEG4 Biotinylation kit (ThermoScientific, 21455) as recommended by the manufacturer. Buffer exchange was performed using Zeba Spin Desalting Columns 7k MWCO 5 ml (ThermoScientific; 89891).

Biosensors were hydrated for at least 10 min in a 96-well plate in 200  $\mu\text{l}$  BLI-Buffer [10 mM  $\text{Na}_2\text{HPO}_4$ , 137 mM NaCl, 2.7 mM KCl, 1.8 mM  $\text{KH}_2\text{PO}_4$ , 10 mM  $\text{MgCl}_2$ , 5% glycerol, pH 7.4].

As a starting point, unspecific binding was tested. For this, unbiotinylated protein was used to be loaded onto the Streptavidin biosensor. Additionally, loaded biotinylated-protein was tested with BLI Buffer only in order to rule out unspecific binding of the buffer. For the Binding assays the initial baseline was measured in a black 0.5 ml reaction tube filled with 250  $\mu\text{l}$  BLI Buffer. Next, 4  $\mu\text{l}$  of bait protein was pipetted into the drop holder of the machine and loaded onto the biosensor. Another baseline was measured in the same tube as before. For the association the analyte protein (in different concentrations) was pipetted into the cleaned drop holder. For the dissociation, the machine was shifted back to the tube position. For each measurement a fresh biosensor was used.

Kinetic analysis and fitting were performed by the BLItz Pro Software (version 1.3.1.3). Data were exported and visualized using RStudio (47) (version RStudio 2022.07.0 + 548 and R (48) version 4.2.1 (June 23, 2022) and package ggplot2 (49).

The BLItz Pro Software analysis follows a 1:1 binding model, where:

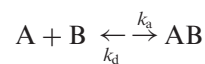

with  $k_a$  = rate of association or ‘on-rate’ and  $k_d$  = rate of dissociation or ‘off-rate’

Formula for fitting the association:

$$Y = Y_0 + a(1 - e^{-k_{\text{obs}} \times t}); a = \text{slope}$$

$$k_{\text{obs}} = k_a \times [A(M)] + k_d$$

And formula for fitting the dissociation:

$$Y = Y_0 + a \times e^{-k_d \times t}$$

Resulting in the equilibrium dissociation constant  $K_D$ :

$$K_D = \frac{k_d}{k_a}$$

## Microscopic analyses

**Fluorescence microscopy.** *C. glutamicum* cells were grown in BHI medium (OXOID) at 30°C, 200 rpm. Plates and liquid cultures were supplemented with 50  $\mu\text{g ml}^{-1}$  kanamycin when needed (CMG012, CMG013, CMG014, CMG015, CMG018, CMG032, CMG034). Colonies were picked from freshly plated stocks and grown overnight. The next morning, a fresh culture with an  $\text{OD}_{600}$  of 0.5 was started and grown until an  $\text{OD}_{600}$  of  $\sim 2$ . About 1 ml of the culture was stained with 250 nM HaloTag TMR Ligand (Promega) for 30 min at 30°C. Cells were harvested (4000 rpm, 3 min, 30 °C) and washed five times in PBS buffer, pH 7.4 (sterile filtered 0.2  $\mu\text{m}$ ).

Agar pads were prepared with the aid of gene frames (Thermo Fisher) and 1% (w/v) low melting agarose (agarose, low gelling temperature, Sigma-Aldrich) in sterile filtered PBS buffer, pH 7.4 (0.2  $\mu\text{m}$  pores).

Epifluorescence imaging was performed with an Axio Observer.Z1 7 (Zeiss) inverted microscope equipped with camera HDCamC10600-10B (ORCA-R2 Hamamatsu Camera). Cells were observed through a Plan-Apochromat 100 $\times$ /1.4 Oil Ph 3 objective with a numerical aperture of 1.4 at 30°C using the TempModul S1 (D).

The microscope is equipped with the Colibri 5/7 LED light source. TMR fluorescence was detected using the filter set 43 HE DsRed (EX BP 550/25, BS FT 570, EM BP 605/70). An exposure time of 5 s was used. Images were acquired using the ZEN 3.1 (blue edition) Software from Zeiss. Image analysis and data processing was performed with FIJI Software (50) and Plug-in MicrobeJ (51).

**Single molecule localization microscopy/ single particle tracking.** *C. glutamicum* cells were grown in BHI medium (OXOID) at 30°C, 200 rpm. Plates and liquid cultures were supplemented with 50  $\mu\text{g ml}^{-1}$  kanamycin when needed (CMG015, CMG012, CMG018, CMG032, CMG033, CMG034, CMG035). Colonies were picked from freshly plated stocks and grown overnight. The next morning, a fresh culture with an  $\text{OD}_{600}$  of 0.5 was started and grown until an  $\text{OD}_{600}$  of  $\sim 2$ . About 1 ml of the culture was stained with 50 nM HaloTag TMR Ligand (Promega) for 30 min at 30°C. Cells were harvested (4000 rpm, 3 min, 30 °C) and washed five times in TSEMS osmoprotective buffer [50 mM Tris, pH 7.4, 50 mM NaCl, 10 mM EDTA, 0.5% sucrose (sterile filtered 0.2  $\mu\text{m}$ )].

Slides were cleaned with 1 M KOH overnight, rinsed with ddH<sub>2</sub>O and dried with pressurized air. Agar pads were prepared with the aid of gene frames (Thermo Fisher) and 1% (w/v) low melting agarose (agarose, low gelling temperature, Sigma-Aldrich) in sterile filtered TSEMS (0.2  $\mu\text{m}$  pores).

The single molecule localization microscopy (SMLM) imaging was performed with an Elyra 7 (Zeiss) inverted microscope equipped with two pco.edge sCMOS 4.2 CL HS cameras (PCO AG), connected through a DuoLink (Zeiss), only one of which was used in this study. Cells were observed through an alpha Plan-Apochromat 63 $\times$ /1.46 Oil Korr M27 Var2 objective in combination with an Optovar 1  $\times$  (Zeiss) magnification changer, yielding a pixel size of 97 nm. During image acquisition, the focus was maintained with the help of a Definite Focus.2 system (Zeiss). Fluorescence was excited with a 561 nm (100 mW) laser, and signals were observed through a multiple beam splitter (405/488/561/641 nm) and laser block filters (405/488/561/641 nm) followed by a Duolink SR DUO (Zeiss) filter module (secondary beam splitter: LP 560, emission filters: LP570).

For each time lapse series, 10 000 frames were taken with 20 ms exposure time ( $\sim 24$  ms with transfer time included) and 50% 561 nm intensity laser in TIRF mode (62° angle).

For single-particle tracking, spots were identified with the LoG Detector of TrackMate v6.0.1 (52), implemented in Fiji 1.53 g (50), an estimated diameter of 0.5  $\mu\text{m}$ , and median filter and sub-pixel localization activated. The signal-to-noise threshold for the identification of the spots was set at 7. To limit the detection of ambiguous signal, frames belonging to the TMR bleaching phase (first 500 frames) were removed from the time lapses prior to the identification of spots. Spots were merged into tracks via the Simple LAP Tracker of TrackMate, with a maximum linking distance of 500 nm, two frame gaps allowed, and a gap closing max distance of 800 nm. Only tracks with a minimum length of 5 frames were used for further analysis, yielding a minimum number of total tracks per sample of 1007.

To identify differences in protein mobility and/or behavior, the resulting tracks were subjected to mean-squared-displacement (MSD), square displacement (SQD) analysis, as described previously (53), and to time-averaged MSD (TAMSD) based cluster analysis. All three analytical approaches relied on SMTracker 2.0 (54).

The ‘Clustering’ tool implemented in SMTracker 2.0 was used to gather groups of tracks characterized by similar dynamic behaviors and visualize their localization via heat maps. Briefly, a machine learning algorithm, called ‘Cluster Analysis’, is applied, and time-averaged MSD values originating from single tracks are classified in different groups. The number of groups was manually set to be equal to the number of subpopulations obtained via SQD analysis.

The average MSD was calculated for four separate time points per strain (exposure of 20 ms— $\tau = 24, 48, 72$  and 96 ms), followed by fitting of the data to a linear equation. The last time point of each track was excluded to avoid track-ending-related artifacts. The cumulative probability distribution of the square displacements (SQD) was used to estimate the diffusion constants and relative fractions of up to three diffusive states (‘fast mobile’, ‘slow mobile’ and

'immobile') (55). The models were then compared via F-test to verify whether an increase in the number of components could be justified. Further, more complex models were accepted only when a statistically significant F-test ( $P$ -value  $< 0.05$ ) was coupled with a decrease in the associated Bayesian information criterion (BIC) bigger than 5%. The diffusion coefficients and population fraction sizes obtained via the CDF fitting were then used to fit the jump distance probability distributions (Supplementary Figure S2). Diffusion constants were determined simultaneously for the compared conditions (MksG and related mutants), therefore allowing for a more direct population fraction comparison.

## Statistics

Mean square displacement, jump distance, time-averaged MSD (TAMSD) based cluster analysis and related statistics were performed via SMTracker 2.0 (56).

## RESULTS

### The MksBEFG system is a widespread plasmid defense system

We have shown before that *C. glutamicum* encodes two condensin-like systems. The Smc-ScpA/B system plays a role in chromosome organization and replicore cohesion. The second condensin-like system share homology to the MukBEF system from *E. coli*. In line with the nomenclature proposed by Petrushenko (2011) we termed this second *C. glutamicum* system MksBEFG (22). In addition to the core condensin complex, which comprises an Smc-like ATPase, a kleisin and kite subunits, the Mks system encodes a fourth MksG subunit in its operon. In *C. glutamicum* the four gene operon is located adjacent to the alcohol dehydrogenase (*adhA*) gene on the chromosome (Figure 1A). The *mks* operon structure (*mksFEFG*, cg3106-cg3103) is conserved also in Gram-negative bacteria harboring this operon, such as *Pseudomonas* species. However, in *P. putida* (KT2440 strain) the *mksB* gene seems to be split while the *P. aeruginosa* (UCBPP-PA14 strain) MksB protein seems to lack the Walker A motif, required for ATP binding (Figure 1A).

We have shown before that the MksBEFG system from *C. glutamicum* is involved in plasmid defense and/or copy number control (13). A *mksB* deletion resulted in a significant increase of low-copy plasmids (pBHK18), but not medium-copy plasmids (pJC1) (13). Strikingly, the increase in pBHK18 copy number in cells lacking components of the Mks system, suggests that pBHK18 is rather a medium copy plasmid which is actively suppressed by the Mks system. Here, we show a detailed analysis of the MksBEFG complex and of its role in plasmid defense. Similar to the deletion of *mksB*, null alleles of *mksG* and *mksF* have an effect on the copy number of the pBHK18 plasmid, but not of pJC1 (Figure 1B). Isolation of plasmid DNA from the different strain backgrounds revealed that deletion of either *mksB*, *mksF* or *mksG* leads to an increase in plasmid yield, in line with the qPCR data. Thus, the presence of all three major subunits of the Mks system, including the so far uncharacterized subunit MksG, is required for an effective plasmid defense.

MksG comprises two domains of unknown function (DUF3322 and DUF2220). A domain organization analysis using the SMART platform (57) revealed 1366 proteins with the same domain architecture (DUF3322 plus DUF2220) in bacteria and archaea (Figure 1C). MksG-like proteins are encoded not only in Corynebacteriales, but in a wide variety of bacterial clades (47.8% proteobacteria, 37.8% actinobacteria, 4.2% bacterioidetes, 2.5% spirochaetes, 2.2% firmicutes and 5.5% others). The Mks system was also identified in some archaea. Interestingly, MksG-like proteins are not found in all members of a family and hence it is likely that the gene was spread by HGT, as suggested earlier (4).

### MksG reveals a topoisomerase fold and exhibits ion-dependent nuclease activity

To get insights into the function of MksG we determined its structure by combining low resolution X-ray data at 4.6 Å resolution with high confidence AlphaFold2 (AF2) models (Supplementary Table S4). MksG is formed by two domains, an N-terminal (N-ter) elongated domain formed of mostly  $\alpha$ -helices as well as an elongated 3 stranded  $\beta$ -sheet, and a C-terminal (C-ter) domain with a central  $\beta$ -sheet, flanked by  $\alpha$ -helices (Figure 2A). The C-ter domain forms a dimer in the crystal by extending the central  $\beta$ -sheet. The N- and C-terminal domains are connected by a flexible hinge region (Figure 2A,B). A structural homology search using DALI on the AF2 database revealed that the C-ter domain is homologous to the topoisomerase VI (Topo VIA) domain of the Rec12/Spo-11 meiotic recombination factor. Topo VI belongs to the topoisomerase II family members that function as hetero-tetramers of two A-subunits, containing the TOPRIM and 5Y-CAP catalytic domains responsible for DNA cleavage as well as two ATPase B-subunits that are responsible for DNA positioning and movement (26,58).

Based on the obtained structural data, we expected MksG to have nuclease activity. Based on our observation that loss of MksG leads to plasmid enrichment in *C. glutamicum* (Figure 1 and (13)), we used plasmid DNA for nuclease experiments. Plasmid DNA is present in three conformations: open-circular (OC) (nicked), linear (L) and supercoiled/ closed-circular-conformation (CCC). The untreated plasmid was found to be predominantly in the closed circular conformation. Addition of MksG led to an increase in the nicked (OC) and linear conformation, while the supercoiled fraction decreased (Figure 3). Longer incubation ( $> 1$  h) led to a degradation of the plasmid DNA (Supplementary Figure S3), indicating that MksG is indeed an active nuclease.

DNA cleavage occurs via a general acid-base mechanism where a general base deprotonates the active site tyrosine hydroxyl, allowing the oxyanion to attack the scissile phosphate of the DNA and a divalent metal, generally  $Mg^{2+}$  is required to stabilize the scissile phosphate (59). The tyrosine engages in a covalent bond formation with the 5' phosphate of the DNA. This covalent enzyme-DNA complex can be religated in topoisomerase activities (60–62). Sequence alignments and the structural superposition with the Topo VIA subunit of *Methanocaldococcus jannaschii* (26) show a conserved position for the magnesium

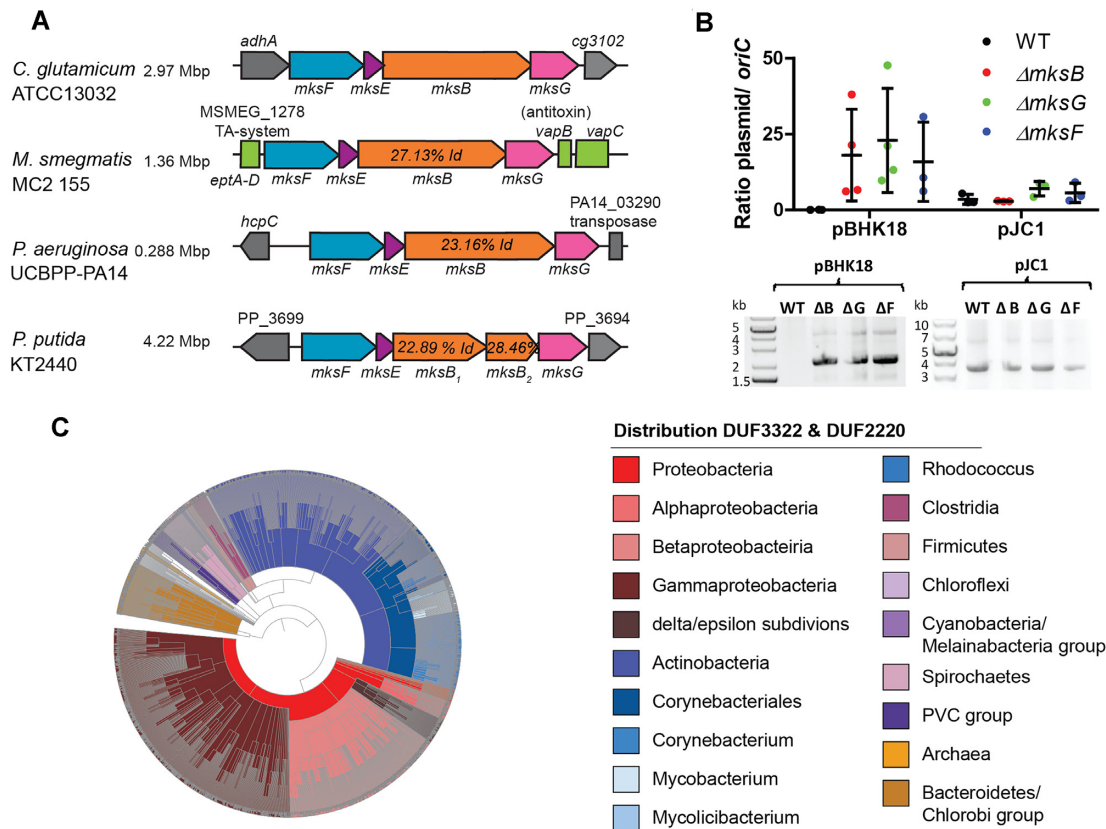

**Figure 1.** MksBEFG- defense system is widespread. (A) Representation of the *mksFEBG*-operon organization from different organisms: (i) *C. glutamicum* ATCC13032, (ii) *M. smegmatis* *mc*<sup>2</sup> 155, (iii) *P. aeruginosa* UCBPP-PA14 and (iv) *P. putida* KT2440. (B) Plasmid copy numbers of low copy (pBHK18) and high copy number plasmids (pJC1) relative to *oriC* numbers per cell, assayed by qPCR. Ratios were compared between *C. glutamicum* WT (MB001),  $\Delta mksB$ ,  $\Delta mksG$ ,  $\Delta mksF$  cells grown in BHI medium with selection antibiotic (mean  $\pm$  SD,  $n = 3$ ). Plasmids pBHK18 and pJC1 were extracted from *C. glutamicum* WT,  $\Delta mksB$ ,  $\Delta mksG$ ,  $\Delta mksF$  cells grown in BHI medium with antibiotic selection, visualization of extracted DNA on 0.8% agarose gels. (C) Phylogenetic analysis of MksG-like proteins (organized in DUF3322 and DUF2220 domains) using the SMART platform (57) reveals the distribution among Gram-negative and Gram-positive bacteria and archaea.

binding residues essential for activity (Figure 2B,C). Therefore, we investigated ion dependency of MksG activity and thus tested the effect of different divalent metal ions on the DNA cleaving activity of MksG (Figure 3). The highest nuclease activity was observed for 10 mM  $Mn^{2+}$ -ions. Addition of the metal ion chelator EDTA completely abolished MksG nuclease activity. Other divalent cations such as  $Ni^{2+}$ ,  $Zn^{2+}$  and  $Ca^{2+}$  also catalyze a weak, but detectable nicking activity, while  $Cu^{2+}$  ions do not support activity (Figure 3).

To corroborate the ion binding-site we mutated two of the amino acid residues, E236 and D279, predicted by sequence alignment (Supplementary Figure S4) and structural analysis to be essential for the ion binding, to alanine. We expected that the mutants would not be able to bind the ion ligand ( $Mg^{2+}/Mn^{2+}$ ) and therefore lose the ability to cleave DNA. In line with our hypothesis, the two MksG mutants (MksG<sup>E236A</sup>, MksG<sup>D279A</sup>) had drastically impaired nuclease activity (Figure 3).

Structural comparison of MksG with Topo VIA shows that the TOPRIM domain dimerizes, in the same way in both proteins (Figure 2C), to form a DNA binding groove and allow for double-stranded DNA breaks. In MksG the

TOPRIM domain is conserved. The N-terminal domain of MksG is positioned in a similar manner to the 5Y-CAP domain in Topo VIA with respect to the TOPRIM domain (Figure 2C), but there is no tyrosine candidate in the equivalent 5Y-CAP domain that could have a catalytic role. The only tyrosine within reasonable distance for a putative catalytic role is Tyr258 (Figure 2C), located within the TOPRIM domain. Interestingly from the DALI search on the AF2 database, several eukaryotic homologs of the Spo11 family have a conserved Tyr in the same position, and this residue seems to be conserved in other actinobacterial homologs but not in Topo VIA or JetD (63). For JetD, two conserved glutamate residues have been proposed as alternative nucleophiles which correspond to the conserved E349 and E351 in the MksG structure (Figure 2B and Supplementary Figure S4). To test whether Y258 is involved in the DNA cleaving activity of MksG, we replaced Y258 by an alanine (Y258A mutant). Nuclease activity assays revealed that indeed the Y258A mutant has a drastically reduced cleavage activity (Figure 3). However, a residual activity was still observed, suggesting that the alternative glutamate residues described above could contribute to activity.



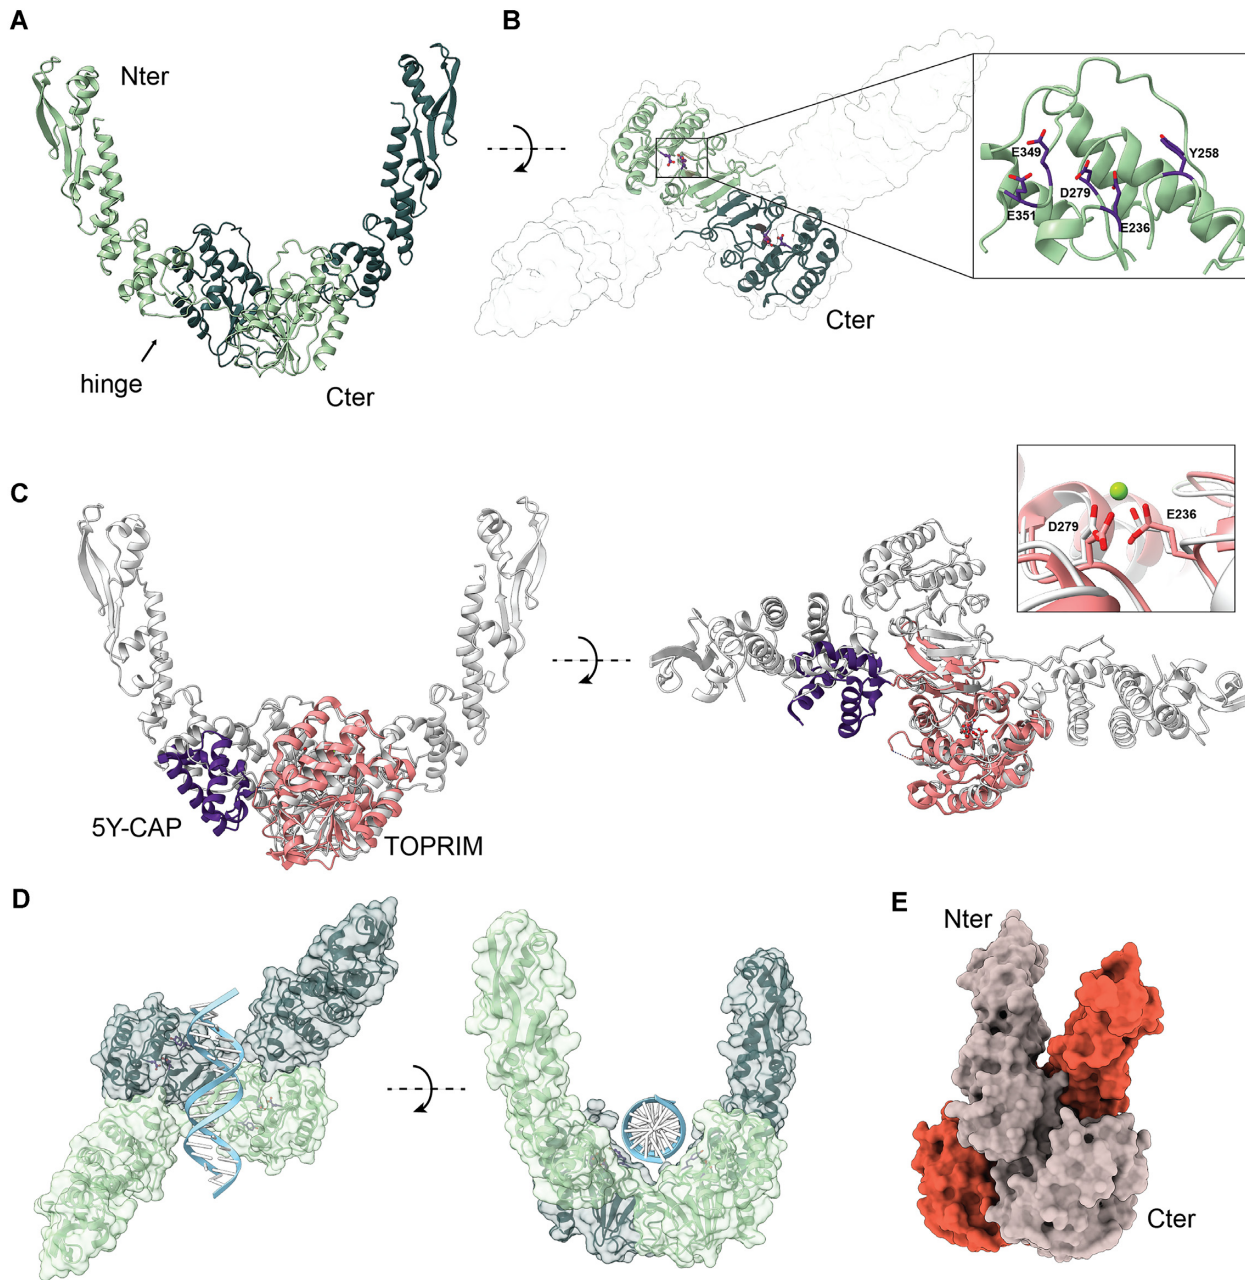

**Figure 2.** Structural characterization of MksG. (A) Cartoon representation of the dimer of MksG. Each monomer is shown in light and dark green, respectively. The flexible hinge region for one monomer is indicated by an arrow. (B) The C-terminal domain is shown as a cartoon and the position of the predicted active site residues is highlighted. The insert shows the  $Mg^{2+}$ -binding residues E236 and D279, as well as the putative active site Y258, and the alternatively proposed nucleophilic residues E349 and E351. (C) Superposition of Topo VIA from *M. jannaschii* (PDB code: 1d3y). The TOPRIM domain (in pink) superposes well with the C-terminal domain of MksG with an RMSD between 52 pruned atom pairs is 1.074 angstroms (calculated using matchmaker of ChimeraX). The 5Y-CAP domain of Topo VIA is shown in purple, and partially overlaps with a topologically similar domain in the lower part of the N-terminal domain of MksG. The superposition of the metal binding site as seen in the Topo VIA structure is highlighted in the inset. (D) A model of a double-stranded DNA molecule was positioned above the two active sites of MksG to visualize a possible DNA binding mode. (E) Surface representation of the closed conformation of the JetD dimer (63) incompatible with DNA binding (PDB code: 7TIL).

A modelled DNA molecule could be placed into the putative binding cleft formed by the MksG dimer and the distance between the two active sites could be compatible with double stranded DNA breaks (Figure 2D). The elongated N-terminal domain may also serve to stabilize DNA-binding, and two conserved positively charged residues (R156 and K166) (Supplementary Figure S4) in the

N-terminal domain are well positioned to serve this purpose. This part resembles the transducer domain of the B subunit of topoisomerases that links the Bergerat ATPase domain with the 5Y-CAP of the A subunit. Importantly, MksG lacks any ATP binding domain. The structural analysis together with the catalytic activities provide strong evidence that MksG is indeed a bona fide Topo VIA homolog.

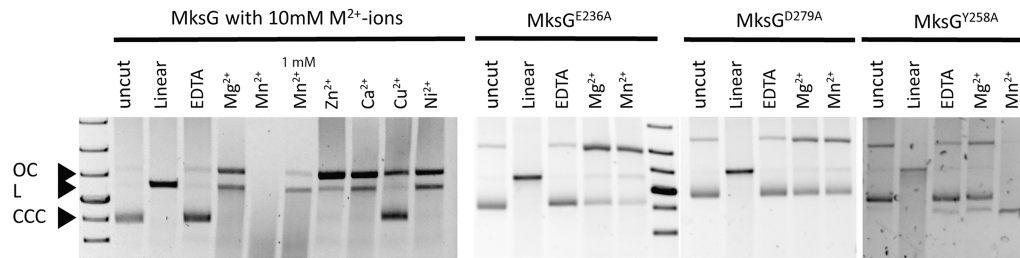

**Figure 3.** MksG is the active nuclease subunit of the defense system. Nuclease activity assays of MksG dimer, 5  $\mu$ M protein were incubated 1 h at 30°C with 250 ng plasmid DNA (pJC1, 6108 bp) and 10 mM different divalent Metal-ions (second lane with  $Mn^{2+}$  only 1 mM). Reaction was stopped by adding 6x purple loading dye (NEB) and boiling samples 5 min at 90°C. DNA was separated on an agarose gel in TAE buffer. Assays for mutants (MksG<sup>E236A</sup>, MksG<sup>D279A</sup>, MksG<sup>Y258A</sup>) were incubated 3 h at 30°C.

### MksB ATPase is stimulated by complex formation and DNA binding

MksG is encoded in an operon with the condensin-like MksBEF complex. Since deletion of *mksG* has the same effect on plasmid stability as the MksB or MksF deletions (Figure 1), these proteins likely act as a complex *in vivo*. The *mksB* gene encodes for an 1111 amino acid condensin-like polypeptide with a calculated molecular weight of 126.58 kDa. The sequence analysis reveals that MksB shares the five-domains architecture with other condensins such as Smc and MukB [(i) the conserved amino-terminal (N-terminal) Walker-A motif, (2) coiled-coil region, (iii) hinge-domain, (iv) coiled-coil domain and (5) conserved carboxy-terminal (C-terminal) Walker-B and signature-motif] (16,22,64–65) suggesting that the MksB from *C. glutamicum* also belongs to the ABC class of ATPases (Supplementary Figure S5). Even though the structure of condensins is highly conserved the sequence identity is rather low (~25%) (Figure 1 and Supplementary Figure S5).

In order to understand and characterize the molecular complex, the four proteins were heterologously expressed with a poly-His-Tag in *E. coli* and purified in via several chromatography steps (see Materials and methods section). All proteins were purified to homogeneity and used for the *in vitro* assays (Figure 4A). Although MksF and MksE could be purified individually, co-purification of both proteins stabilized the proteins against degradation during the isolation process.

MksB revealed a low basal ATPase activity that followed Michaelis–Menten kinetics (Figure 4B). For this, 4  $\mu$ M of MksB were incubated with different concentrations of  $Mg^{2+}$ -ATP (0–5 mM) (Figure 4B). A Hill-coefficient of  $n_h = 0.97$  was determined, confirming that MksB ATPase activity is not cooperative. The calculated  $v_{max}$  value was 0.023  $nmol\ min^{-1}$  and is quite low compared with other MukB-like ATPases (66). As expected, in the Walker B hydrolysis deficient mutant MksB<sup>E1042Q</sup> ATPase activity was impaired (Figure 4C). However, we observed in a titration assay that the activity values calculated negative values (subtracting no substrate and ATP auto-hydrolysis values) suggesting that the mutant MksB<sup>EQ</sup> is indeed inactive and that the low activities of MksB alone are at the detection limit of the phosphate release assay. In line with data described for the MukB/MukF interaction addition of equimolar concentrations of the kleisin subunit MksF and the kite sub-

unit MksE stimulated the ATPase activity of MksB (Figure 4C). Further rise of MksEF concentration (6 and 8  $\mu$ M each) lead to further increase of MksB's activity. Addition of equimolar amount of MksG to MksBEF had no impact on ATPase activity. Furthermore, the addition of plasmid DNA (pBHK18) led to an increase of MksB's activity (Figure 4C). The maximum ATPase activity that we measured was with equimolar amounts of MksBEF and plasmid DNA (0.32  $nmol\ min^{-1}$ ). Interestingly, the addition of MksG to MksBEF and plasmid DNA led to a significant decrease of activity (0.16  $nmol\ min^{-1}$ ), likely because of the nuclease activity of MksG that might reduce the DNA concentration within the assay. The MksBEFG system from *C. glutamicum* displays significant differences with the MukBEF complex, where addition of the kite subunit decreases ATPase activity, suggesting this activity could be differently regulated in the two systems (66). We controlled for a possible influence of the histidine tag on MksB with respect to ATPase activity. Therefore, we cleaved the tag and measured the ATPase activity of untagged MksB with essentially the same ATPase activities, indicating that the histidine tag does not interfere with MksB activity (Supplementary Figure S6).

MksB alone is able to bind and shift DNA in gel electrophoretic mobility shift assays (EMSA) (Figure 4D). Binding of MksB to linear, supercoiled or nicked-plasmid DNA was ATP-independent. MksEF alone are not able to bind and shift DNA. These data suggest that MksB is the DNA-binding subunit in the MksBEFG complex, similar to the well-characterized MukBEF complex. *In vitro* we were not able to identify any selectivity of MksB binding to DNA. However, we speculate that *in vivo* the MksBEFG complex likely identifies incoming plasmid DNA. The precise mechanism why and how the *C. glutamicum* MksBEFG system reacts to low-copy number plasmids and not to others remains to be analyzed.

### MksF links MksG to the MksBEF complex

The complex assembly for the *E. coli* MukBEF is relatively well known (67,68). However, it remained unclear how the MksBEFG complex is assembled. In particular the localization of the nuclease subunit MksG was unclear. Therefore, we used Bio-Layer Interferometry (BLI) to analyze how the subunits interact with each other. For this we biotinylated each protein to test different conformations and

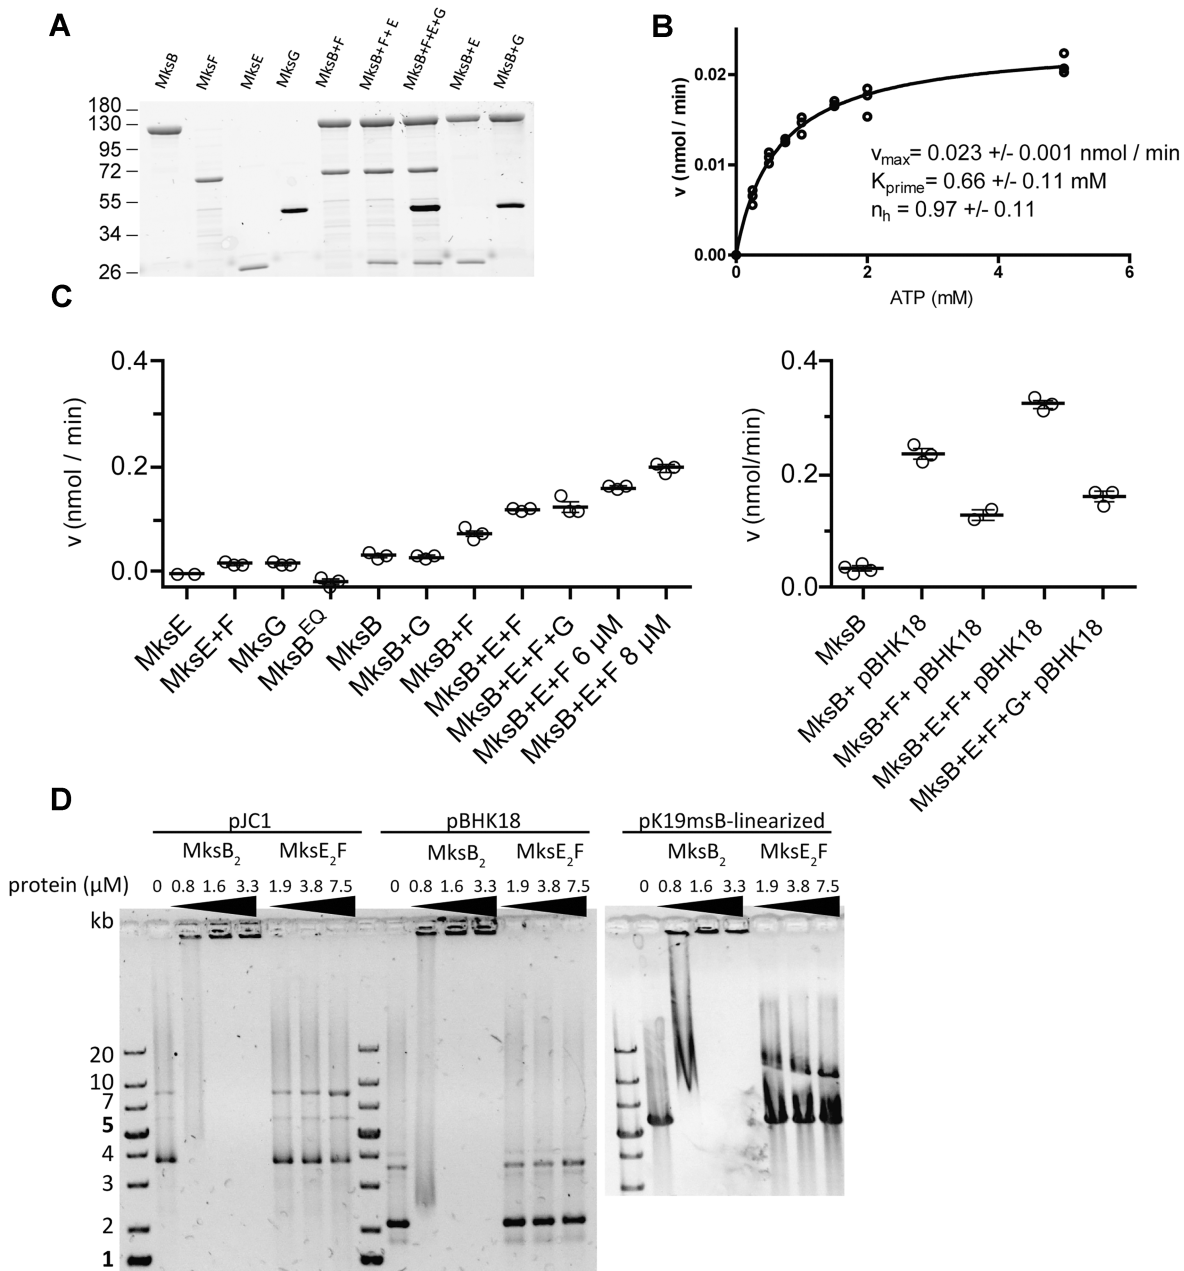

**Figure 4.** MksB ATPase activity and DNA binding *in vitro*. (A) SDS-PAGE (stain-free) of purified Mks-proteins after ATPase assay, indicating highly purified Mks proteins. (B) MksB<sub>2</sub> (2  $\mu$ M) ATPase activity following Michaelis–Menten kinetics at different ATP concentrations (0–5 mM). (C) MksB<sub>2</sub> (2  $\mu$ M) ATPase activity analysis in combination with the other subunits, MksB<sup>EQ</sup>-mutant and plasmid pBHK18. About 4  $\mu$ M of each subunit (calculated as monomeric protein) was applied, unless stated otherwise, plasmid DNA was 50 ng  $\mu$ l<sup>-1</sup> and 2 mM Mg-ATP. ATPase measurements were taken in a time-course of 3 h, no substrate controls and ATP auto-hydrolysis were subtracted from values. Each data point represents one time-course measurement, the mean is shown as line with standard error,  $n = 3$ ). (D) MksB binds circular and linear plasmid DNA independent of Mg-ATP. MksE<sub>2</sub>F are not able to bind to DNA on their own. Electrophoretic mobility shift assays of MksB, MksE<sub>2</sub>F were preincubated with 200 ng circular (pJC1, 6108 bp; pBHK18, 3337 bp) and linear (pK19mobsacB, 5722 bp) plasmid DNA.

immobilized always one subunit at a time with Streptavidin (SA) biosensors. Having one bait protein immobilized to the sensor, association with the analyte protein (different concentrations were tested) was performed. We controlled for unspecific binding to the sensor by using non-biotinylated protein (Supplementary Figure S7). Several combinations did not show interactions. We tested immobilization of MksF with MksB and MksE as analytes, MksG

immobilized with MksB and MksE as analytes and immobilized MksB and MksE as analyte. In all these combinations no protein-protein interaction was observed via BLI (data not shown). Successful BLI interactions were shown for the kleisin and kite subunits MksF and MksE (Figure 5A). This interaction was expected since the kite and kleisin subunits in other MukBEF-like systems also interact. We immobilized MksE (25  $\mu$ g ml<sup>-1</sup>) and titrated with MksF

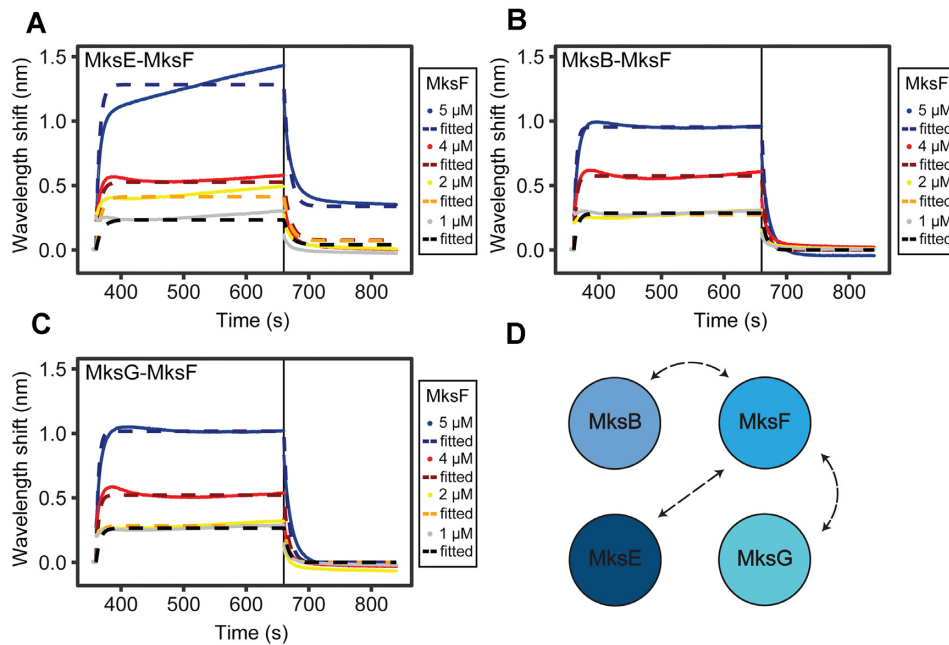

**Figure 5.** MksF is the interaction hub of the MksBEFG complex. Bio-Layer interferometry of (A) immobilized biotinylated MksE ( $25 \mu\text{g ml}^{-1}$ ) with MksF ( $1\text{--}5 \mu\text{M}$ ) (B) immobilized biotinylated MksB ( $50 \mu\text{g ml}^{-1}$ ) with MksF ( $1\text{--}5 \mu\text{M}$ ) and (C) immobilized biotinylated MksG ( $100 \mu\text{g ml}^{-1}$ ) with MksF ( $1\text{--}5 \mu\text{M}$ ). Initial Baseline was generated for 30 s, loading of the bait was performed for 300 s, a second baseline was generated for further 30 s, association with the analyte was performed for 300 s and final dissociation was performed for 180 s. (D) Interaction map of the Mks subunits based on BLI analysis.

( $1\text{--}5 \mu\text{M}$ ) (Figure 5). As expected from previous chromatography experiments with MksEF co-purification, we observed the strongest interaction between MksE and MksF with a  $K_D$  (equilibrium dissociation constant) value of  $2.17 \mu\text{M}$  (Table 1). At the highest concentration of MksF ( $5 \mu\text{M}$ ), 1:1 binding of MksE:MksF could not be observed anymore. This suggests that there is more than one binding site of the analyte to the bait and heterologous binding occurs. This implies that one MksF molecule binds to two immobilized MksE molecules, as it has been described for MukF-MukE or ScpA/ScpB interaction.

Furthermore, we immobilized MksB ( $50 \mu\text{g ml}^{-1}$ ) and measured interaction with MksF ( $1\text{--}5 \mu\text{M}$ ) (Figure 5B). Here, we observed interaction with a  $K_D$  value of  $4.94 \mu\text{M}$  (Table 1) and no apparent heterologous binding. Testing further possibilities, we found that immobilizing MksG ( $100 \mu\text{g ml}^{-1}$ ) and using MksF as analyte we observed clear interaction. We determined the  $K_D$  value of  $6 \mu\text{M}$  as the highest value, resulting in the lowest affinity of the complex. Most importantly, we could show the interaction of MksG with the kleisin subunit MksF (Figure 5C). This was somewhat surprising, since in *E. coli* the ATPase MukB interacts physically with the topoisomerase IV. However, in the MksBEFG system the topo VI-like MksG rather interacts with the kleisin subunit. All kinetic parameters from the bi-layer interferometry experiments are summarized in Table 1 and are in line with our previous bacterial-two-hybrid data (13).

From these data, we conclude that MksF serves as an interaction hub between the central complex (MksBEF) and the novel nuclease subunit MksG.

#### Localization of the MksBEFG complex *in vivo* and interaction *in vitro*

Previously, we reported that MksB co-localizes with the polar scaffold protein DivIVA (13). Next, we wanted to analyze and compare the localization of each subunit of the complex. Therefore, each subunit was genetically fused with the sequence of Halo-Tag and inserted into the native locus in the genome, to preserve physiological protein levels. Importantly, in-gel fluorescence revealed that all fusions were expressed as full-length proteins. We observed no major degradation of the fusions (Supplementary Figure S8), suggesting that the constructs were well suited for microscopic analyses. Furthermore, we tested whether the Mks Halo fusion proteins were functional by testing plasmid copy number using qPCR. All Mks fusions were able to restrict the pBHK18 plasmid copy number effectively. However, for the MksE-Halo and MksF Halo fusion, we observed a slight increase in plasmid copy number, indicating that this fusion causes a mild phenotype (Supplementary Figure S9). We had shown before that MksB-mCherry localized to the cell poles and may interact with the polar scaffold protein DivIVA (13). MksB-Halo localized as expected to the cell poles and septa in *C. glutamicum* (Figure 6A). To test if this localization is DivIVA or cell pole dependent, we constructed a CRISPRi depletion strain in which we could downregulate the expression of the essential DivIVA protein (32). After DivIVA depletion cells lose their rod-shaped morphology and the MksB localization gets random (Supplementary Figure S10). In wild-type cells, MksE-Halo and MksF-Halo exhibited the same polar localization that was observed for MksB-Halo (Figure 6BC), as expected based

**Table 1.** Protein-protein interaction among complex

| Interaction partners | $K_D$ [ $\mu\text{M}$ ] | $k_a$ [ $\text{M}^{-1} \text{s}^{-1}$ ] | $k_{a\text{error}}$ | $k_d$ [ $\text{s}^{-1}$ ] | $k_{d\text{error}}$ | $\chi^2$ | $R^2$ |
|----------------------|-------------------------|-----------------------------------------|---------------------|---------------------------|---------------------|----------|-------|
| MksE-MksF            | 2.17                    | $7.42 \times 10^4$                      | $0.48 \times 10^4$  | 0.16                      | 0.0027              | 1.9      | 0.98  |
| MksB-MksF            | 4.94                    | $2.78 \times 10^4$                      | $0.16 \times 10^4$  | 0.138                     | 0.0018              | 2.28     | 0.99  |
| MksG-MksF            | 6                       | $2.25 \times 10^4$                      | $0.16 \times 10^4$  | 0.136                     | 0.002               | 3.041    | 0.99  |

on the strong interaction of these proteins within the MksBEF complex. Despite MksBEF localizing similarly to the cell poles, we found that MksG-Halo localization to the cell poles was less pronounced (Figure 6D). Rather, a large proportion of MksG localized as a cytosolic molecule that does not form strong polar foci, but a septal enrichment remained obvious (Figure 6D). Localization of MksG remained less polar in presence of a plasmid (pBHK18) (Figure 6E); however, deletion of *mksB* had a significant effect on MksG localization. In the *mksB* null allele background MksG localized more polar and less cytoplasmic (Figure 6F). The effect caused by the addition of pBHK18 in the *mksB* deletion background is not as obvious. While the localization of MksG does not appear impacted (Figure 6G, black arrows), the presence of the pBHK18 plasmid in presence of a non-functional Mks system results in the formation of phase-bright foci that are fluorescent under the imaging conditions used (Figure 6G, orange arrows), even in absence of TMR, suggesting that a plasmid derived product accumulates when high copy numbers of pBHK18 are present. These aggregates mask the localization of Mks proteins in wide field microscopy, but not in SPT imaging.

These data indicate that the MksBEFG system is spatially confined to the cell poles in *C. glutamicum*. However, MksG seemed to be more mobile and less well constricted to the cell poles. This changed in absence of MksB, suggesting that the presence of MksB is required for the correct polar recruitment/release of MksG.

### MksG dynamics depend on MksB and plasmid DNA

To further characterize and understand the relationship between MksG and MksB localization, we used SMLM in combination with single particle tracking (SPT). SPT experiments were performed at 20 ms exposure time. We aimed to understand how the dynamics of the MksG nuclease change in the presence or absence of plasmid DNA. For this analysis, we used MksG-Halo and MksB-Halo tag fusions stained with TMR dye as the fluorescent ligand as described above.

First, we compared the dynamics of MksB-Halo and MksG-Halo separately (Figure 7A,B). The first striking observation was the apparently much faster dynamics of MksG-Halo compared to MksB-Halo. Using the mean-squared displacement (MSD) as a quantitative indicator of the averaged diffusion speed we showed that the diffusion coefficient of MksG-Halo ( $D = 0.241 \mu\text{m}^2 \text{s}^{-1}$ ) was 4.4× larger than for MksB-Halo ( $D = 0.055 \mu\text{m}^2 \text{s}^{-1}$ ) (Figure 7A). The slope of the linear fit served as a good estimation for the diffusion coefficient for simple Brownian motion of a single population that does not undergo changes in motion. Importantly, the dynamics of MksG was altered in the absence of MksB. In a strain background where

*mksB* was deleted the dynamics of MksG decreased ( $D = 0.164 \mu\text{m}^2 \text{s}^{-1}$ ) (Figure 7A). Strikingly, addition of plasmid DNA resulted in two, opposite, phenomena: addition of pBHK18 caused an increase in MksG dynamics ( $D = 0.264 \mu\text{m}^2 \text{s}^{-1}$ ) while addition of pJC1 caused a decrease in MksG dynamics ( $D = 0.115 \mu\text{m}^2 \text{s}^{-1}$ ) (Figure 7A). A similar effect was then observed when the two plasmids were transformed into the *mksB* deletion strain, with pJC1 causing a decrease in MksG dynamics ( $D = 0.136 \mu\text{m}^2 \text{s}^{-1}$ ) and pBHK18 causing an increase in MksG dynamics ( $D = 0.219 \mu\text{m}^2 \text{s}^{-1}$ ).

Given that protein dynamics do not usually originate from a single population that moves via Brownian motion, but rather comprise separate subpopulations, each defined by its own parameters, we further proceeded to perform jump distance (JD) analysis. Thus, we were able to identify three distinct populations ('fast mobile', 'slow mobile' and 'immobile') for MksG-Halo (WT) and two ('slow mobile' and 'immobile') for MksB-Halo (WT) (Figure 7B). Strikingly, MksG has a large fast-mobile population ( $D = 0.479 \pm 0.001 \mu\text{m}^2 \text{s}^{-1} / 47.7 \pm 0.001\%$ ), which is instead lacking in MksB dynamics. This fast-mobile population is decreased in a strain with *mksB* deletion ( $31.8 \pm 0.001\%$ ) suggesting that deletion of *mksB* results in an increased level of polar/septal anchored MksG. Both MksB and MksG exhibit 'slow mobile' and 'immobile' protein subpopulations which are characterized by similar, independently fitted, diffusion rates ('Slow mobile':  $D_{\text{MksG}} = 0.105 \pm 0 \mu\text{m}^2 \text{s}^{-1}$ ,  $D_{\text{MksB}} = 0.0982 \pm 0 \mu\text{m}^2 \text{s}^{-1}$  / 'Immobile':  $D_{\text{MksG}} = 0.0151 \pm 0 \mu\text{m}^2 \text{s}^{-1}$ ,  $D_{\text{MksB}} = 0.0141 \pm 0 \mu\text{m}^2 \text{s}^{-1}$ ) (Figure 7B). In line with the localization studies (Figure 6), time averaged MSD based clustering revealed that the less dynamic population for both MksB and MksG is enriched at the cell poles, while all the remaining subpopulations are characterized by a rather homogeneous localization (Figure 7C).

We further tested whether MksG dynamics are affected by the addition of pBHK18 to a wild-type and a *mksB* deletion background but could only observe marginal changes (Figure 7B). This is likely caused by the extremely low levels of pBHK18 in wild-type cells, as previously determined via qPCR (Figure 1B). We therefore decided to repeat the experiment with pJC1, a plasmid that is present in substantial copies in both WT and *mksB* deletion background. The addition of pJC1 to the wild-type background resulted in the sharp decline of MksG 'fast mobile' subpopulation ( $15.2 \pm 0.001\%$ ) and the doubling of the 'immobile' subpopulation ( $33 \pm 0.001\%$ ), suggesting that a significant portion of MksG is DNA associated. The cumulative effect of plasmid dependent DNA association and  $\Delta mksB$  dependent polar/septal anchoring could be observed in the *mksB* deletion strain containing pJC1. While MksG dynamics closely resembled the ones from the *mksB* deletion strain, we could measure a further increase in 'immobile' subpop-

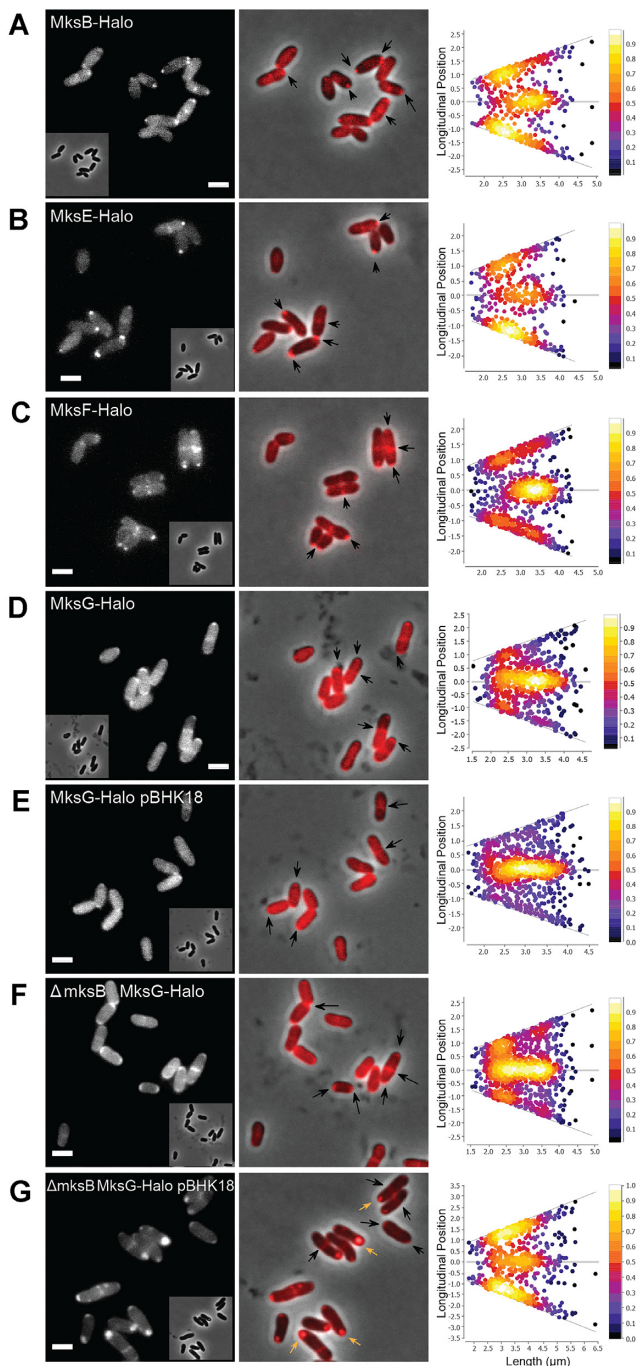

**Figure 6.** MksBEFG localization *in vivo*. Epifluorescence microscopy images of fusion proteins with Halo-Tag labeled with TMR as a ligand (A) of CMG015 cells (number of cells,  $n = 549$ ) (MksB-Halo), (B) of CMG013 cells ( $n = 536$ ) (MksE-Halo), (C) of CMG014 cells ( $n = 863$ ) (MksF-Halo), (D) of CMG012 cells ( $n = 633$ ) (MksG-Halo), (E) of CMG032 cells ( $n = 574$ ) harboring pBHK18 plasmid (MksG-Halo + pBHK18), (F) of CMG018 cells ( $n = 603$ ) ( $\Delta mksB$  MksG-Halo) and (G) of CMG034 cells ( $n = 510$ ) harboring pBHK18 plasmid ( $\Delta mksB$  MksG-Halo + pBHK18). Orange arrows indicate the auto-fluorescence of the phase-bright spots, scale bar: 2  $\mu\text{m}$ . Demographs show the fluorescence maxima distribution along the cell axes sorted by the length of the cell, and cells are not sorted by cell poles.

ulation ( $33 \pm 0.001\%$ ), mirrored by a decrease in the ‘fast mobile’ subpopulation ( $26.3 \pm 0.001\%$ ), suggesting that it is possible for MksG to bind plasmid DNA in absence of a complete complex (Figure 7B).

Finally, we analyzed the spatial distribution of the three MksG protein subpopulations in the above-mentioned genetic backgrounds that were identified via TAMSD-based clustering. The slowest MksG populations were generally localized to the cell poles and septum while the remaining two dynamic populations are rather dispersed within the cytoplasm (Figure 7C). Although the polar/septal enrichment of ‘immobile’ tracks may not appear equal across the analyzed strains the cell segmentation approach that we used is not accurate enough to move beyond the determination of approximate localizations and we therefore refrained from comparing the degree of enrichment.

In summary, SMLM data suggest that the MksBEFG system consists out of an immobile, polar population and a more diffusive population. MksG dynamics is modulated by MksB and, importantly, by the presence of plasmid DNA.

## DISCUSSION

Bacteria have evolved sophisticated complexes to protect their genomic integrity from incoming foreign DNA. The protection systems include those that act against plasmid DNA. In recent years, several new defense machineries in addition to the restriction endonucleases, CRISPR, and argonaute have been described. One of these is the Wadjet system that is composed of a condensin-like complex (4). We have shown earlier that *C. glutamicum* harbors a Wadjet type I system that we termed MksBEFG (13). The Sorek group has transplanted a Wadjet operon into *B. subtilis* and could show that the recombinant strain has drastically reduced transformation frequencies (4). They observed the strongest effect for type I wadjet system. We have shown in *C. glutamicum* that deletion of the condensin subunit MksB leads to a massive enrichment of plasmid copy number in what was previously thought to be a low copy number plasmid (pBHK18). In particular intriguing was the observation of a polar localization of MksB-mCherry in *C. glutamicum* (13). Despite these observations, the data on the molecular function of the Wadjet systems remained sparse. We have therefore set out to analyze the biochemical and cell biological features of the corynebacterial MksBEFG complex in more detail.

All condensin like complexes exhibit a regulated ATPase activity that is linked to the function of these complexes on DNA organization (69). A unifying activity of all SMC complexes is the formation of DNA loops (loop-extrusion) (69–72). This activity on the DNA substrate requires ATPase activity and without a full ATPase cycle SMC complexes do not entrap topologically their DNA substrates. In contrast to many other ATP hydrolyzing enzymes such as transport ATPases the turnover rate of SMC complexes is rather low. The *B. subtilis* Smc and the *E. coli* MukB proteins have a basal activity of around  $0.3 \text{ s}^{-1}$  and  $<0.1 \text{ s}^{-1}$  ATP per SMC complex (73). In both cases addition of the kleisin subunit stimulates the activity between 2- and 10-fold. The observed activity of the *C. glutamicum* MksB is

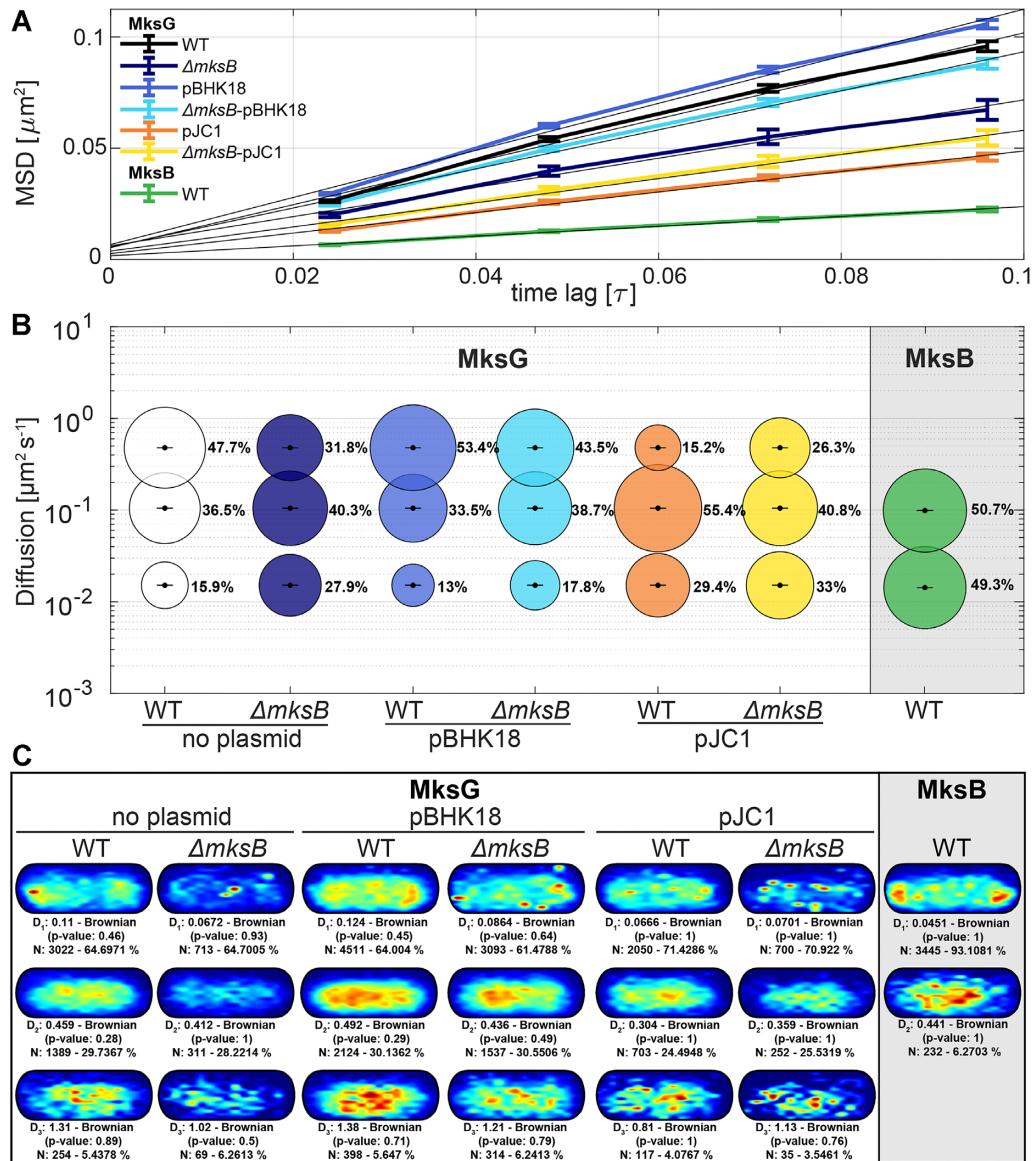

**Figure 7.** MksG dynamics depend on MksB and plasmid DNA. (A) Plot of the mean-squared displacement of the indicated MksG-Halo (in different background strains) / MksB-Halo fusions over time. (B) Bubble plot showing single-molecule diffusion rates of the indicated MksG-Halo (in different background strains) / MksB-Halo fusions. Populations were determined by fitting the cumulative distribution function (CDF) of square displacements with up to a three components model ('fast mobile', 'slow mobile', and 'immobile' protein populations). (C) Localization heat maps of MksG-Halo (in different background strains) / MksB-Halo tracks, indicating likeliness of presence of tracks from low (blue) to high (red) in an averaged cell. The multiple populations do not represent the 'fast mobile', 'slow mobile' and 'immobile' populations previously identified via CDF fitting but comprise instead tracks populations characterized by a shared dynamic behavior as defined by SMTracker2.0 'clustering tool' (see Methods). Strains used for SPT analysis were MksB-Halo (CMG015), MksG-Halo (CMG012), MksG-Halo + pBHK18 (CMG032),  $\Delta mksB$  MksG-Halo (CMG018), MksG-Halo + pJC1 (CMG033),  $\Delta mksB$  MksG-Halo + pBHK18 (CMG034) and  $\Delta mksB$  MksG-Halo + pJC1 (CMG035).

even lower ( $0.01 \text{ s}^{-1}$ ). Stimulation of this low basal activity by addition of the kleisin subunit MksF increased the activity also about 2-fold. Unlike other tested SMC complexes, addition of the kite subunit MksE further increases the basal activity. Addition of DNA further stimulates ATPase activity of the complex up to 10-fold of the basal activity. Interestingly, addition of the individual subunits MksF and MksG led to a decrease of the activity, while assembly of the whole MksBEF complex leads to highest ATPase activities in the presence of plasmid DNA. Addition of the MksG subunit decreases the activity of the DNA stimulated complex. Thus, there are distinct differences in the reg-

ulation of the ATPase cycle between MksBEFG complex and other SMC complexes (66,74). ATP hydrolysis in condensin complexes is required for DNA loop extrusion and hence these complexes can be seen as molecular motors that act in consecutive steps on DNA. At this stage, the exact mechanisms of how MksBEFG identifies and binds to plasmid DNA remains unclear, however, it seems logical that the MksBEFG complex senses DNA topology that is different in plasmid DNA compared to chromosomal DNA. The on-off rate of the complex to its substrate DNA might be much higher and thus the ATPase is not needed to induce repetitive cycles to power loop extrusion.

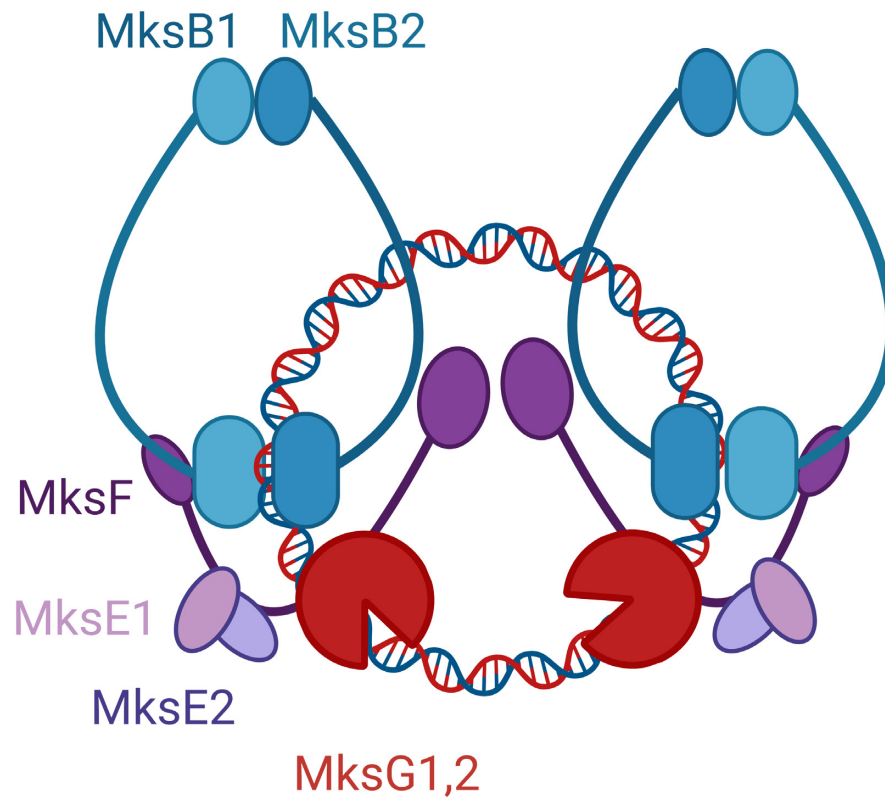

**Figure 8.** Model of the MksBEFG plasmid degradation system. The MukBEF homolog MksBEF likely forms a dimer of dimers that is linking the novel nuclease MksG via the kleisin subunit MksF. This complex organization positions the nuclease subunit in the vicinity of the DNA substrate that can be efficiently cleaved.

Here, we show that MksG is a nuclease that cleaves DNA in a divalent cation-dependent manner. While *in vitro* manganese ions seem to allow highest activity, *in vivo* magnesium ions are likely the cofactor for MksG activity. However, the distantly related gyrase from *Staphylococcus aureus* is also a manganese dependent enzyme (75) and hence, we cannot rule out that MksG may indeed use  $Mn^{2+}$  *in vivo*. MksG shares the TOPRIM fold of Topo VI. These data are supported by very recent publications of Wadjet systems from *Pseudomonas aeruginosa* PA14 and *E. coli* GF4-3 (63,76). In these publications the corresponding JetD (MksG) was also shown to be an endonuclease. Interestingly, in these cases JetD activity strictly required presence of JetABC and ATP *in vitro*. Here, high concentrations of MksG were used in the *in vitro* cleavage assays. It might be that under different buffer conditions activation of the MksG activity by the MksBEF complex will be detected. Mutational analysis, as well as the structure of MksG reveal the conserved ion binding site in MksG and Topo VIA proteins, confirming earlier bioinformatic predictions (4). The acidic residues that coordinate the ion can be superimposed well with the homologous residues from the *M. jannaschii* topo VIA enzyme (26). The catalytically active tyrosine in MksG is likely Y258, positioned right above the ion binding site. The N-terminal domain of MksG might act as a DNA clamp, helping to position or recognize the plasmid DNA. Interestingly in the recently determined structure of the Wadjet nuclease subunit JetD from *Pseudomonas aeruginosa* (63), the MksG homolog is found in a closed confor-

mation (Figure 2E) that would be incompatible with DNA binding. Further experiments will be required to understand how these open and closed conformations of MksG and JetD could be regulated. This places the MksG N-terminus in roughly the same position as the transducer domain of the Topo VIB subunit. A large patch of positively charged amino acids is located at the inner face of the tip of the N-terminal domain, making this an ideal candidate for the DNA binding site. The transducer in Topo VI connects the Bergerat ATPase domain with the Topo VIA subunit. The ATPase activity in Topo VI is required for DNA strand crossing. Strand crossing is likely not required in plasmid defense by MksG and hence this module might be superfluous. However, at this stage we can only speculate about the function of the condensin-like subunits MksBEF. ATP hydrolysis in MksB is not required *in vitro* for MksG activity, but presence of MksB *in vivo* has a clear effect on MksG dynamics and MksB is required for the plasmid defense activity as judged by the null allele phenotype. *In vitro* the nuclease activity of *C. glutamicum* MksG was not dependent on the condensin subunits MksBEF. However, the activity of MksG *in vitro* is slow compared to other nucleases. Therefore, *in vivo* a regulatory effect of MksBEF on MksG might occur.

Interaction of Smc proteins and topoisomerases has been described before. The direct interaction of a Topo IV and MukB is well established (29,77–78). Thus, the interaction of MksBEF and MksG may not come as a surprise. However, there seems to be a large difference in the way the



topoisomerase-like proteins bind to the SMC complexes. In MukBEF systems topoisomerase IV binds to MukB (27,28), while we identified here the kleisin subunit as interaction partner of MksG. Since the structure of the entire complex is unknown the precise interactions of the individual subunits remain unclear. However, bacterial two hybrid data (13) and the biolayer interferometry data presented here, suggest that MksG is localized rather to the region of the kleisin ring. For eukaryotic SMC complexes, it has recently been suggested that the complex contains two DNA binding sites (double chamber) with the so termed meta-chamber in the inter-head/kleisin/kite space (79). The interaction of MksG within this region might position it perfectly to execute its nuclease function on plasmid DNA (Figure 8).

A fascinating aspect of the corynebacterial MksBEFG plasmid defense system is its spatial organization. We showed that all subunits localize to the cell poles in *C. glutamicum*. This polar localization seems to be dependent on the scaffold protein DivIVA. We have shown earlier that MksG and MksF interact with DivIVA in a bacterial two hybrid screen (13). We now show that depletion of DivIVA abolishes Mks complex localization, thereby further supporting the notion that likely a direct interaction between the Mks complex and DivIVA exists. DivIVA interacts with ParB in *C. glutamicum* and therefore localizes the *oriC* to the cell pole (80). However, the bulk of the chromosomal DNA is localized to the cell center. It remains to be tested where plasmids localize in *C. glutamicum*, but it can be assumed that plasmids might be occluded from the bulk of the nucleoid. It is therefore attractive to hypothesize that the MksBEFG complex is polarly localized and activates MksG nuclease activity there. Our single molecule tracking data suggest that MksG ‘immobile’ subpopulation is increased under two separate circumstances: the absence of a complete complex and the presence of plasmid DNA. This would be in line with the idea that both polar/septal anchored and DNA bound MksG molecules would result in static tracks. The combination of an incomplete protein complex with the presence of plasmid DNA does not, however, have a purely additive effect on the ‘immobile’ subpopulation. This is likely due to a decreased likelihood for MksG to bind DNA in absence of MksB. Most importantly, SPT data reveal *in vivo* binding of MksG to pJC1; however this plasmid is apparently not degraded effectively, while pBHK18 is efficiently removed. This suggests that the Mks system is highly regulated and can therefore act both as a plasmid defence and maintenance tool. We hypothesize that, in absence of plasmids, MksG is held in standby at the cell poles by MksBEF. Upon binding to a plasmid, the complex loads and activates MksG. This spatial confinement might prevent toxic activation of the MksBEFG defense system elsewhere in the cell and erroneous nuclease activity on the chromosomal DNA.

## DATA AVAILABILITY

Atomic coordinates and structure factors have been deposited in the protein data bank under the accession code 8B7F.

## SUPPLEMENTARY DATA

Supplementary Data are available at NAR Online.

## ACKNOWLEDGEMENTS

The authors thank Dr. Kati Böhm for strain construction. We gratefully acknowledge the core facilities PFBMI and PFC at the Institut Pasteur C2RT, as well as the synchrotron source Soleil (Saint-Aubin, France) for granting access to the facility and the staff of Proxima 1 for helpful assistance during X-ray data collection.

## FUNDING

This work was funded by the Deutsche Forschungsgemeinschaft [BR2915/6-2 to M.B.] and by institutional grants from the Institut Pasteur, the CNRS, and Université Paris Cité.

*Conflict of interest statement.* None declared.

## REFERENCES

- Arnold, B.J., Huang, I.T. and Hanage, W.P. (2022) Horizontal gene transfer and adaptive evolution in bacteria. *Nat. Rev. Microbiol.*, **20**, 206–218.
- Stern, A. and Sorek, R. (2011) The phage-host arms race: shaping the evolution of microbes. *Bioessays*, **33**, 43–51.
- Wein, T. and Sorek, R. (2022) Bacterial origins of human cell-autonomous innate immune mechanisms. *Nat. Rev. Immunol.*, **22**, 629–638.
- Doron, S., Melamed, S., Ofir, G., Leavitt, A., Lopatina, A., Keren, M., Amitai, G. and Sorek, R. (2018) Systematic discovery of antiphage defense systems in the microbial pangenome. *Science*, **359**, eaar4120.
- Vassallo, C.N., Doering, C.R., Littlehale, M.L., Teodoro, G.I.C. and Laub, M.T. (2022) A functional selection reveals previously undetected anti-phage defence systems in the *E. coli* pangenome. *Nat. Microbiol.*, **7**, 1568–1579.
- Goldfarb, T., Sberro, H., Weinstock, E., Cohen, O., Doron, S., Charpak-Amikam, Y., Afik, S., Ofir, G. and Sorek, R. (2015) BREX is a novel phage resistance system widespread in microbial genomes. *EMBO J.*, **34**, 169–183.
- Johnson, A.G., Wein, T., Mayer, M.L., Duncan-Lowey, B., Yirmiya, E., Oppenheimer-Shaanan, Y., Amitai, G., Sorek, R. and Kranzusch, P.J. (2022) Bacterial gasdermins reveal an ancient mechanism of cell death. *Science*, **375**, 221–225.
- Ofir, G., Herbst, E., Baroz, M., Cohen, D., Millman, A., Doron, S., Tal, N., Malheiro, D.B.A., Malitsky, S., Amitai, G. *et al.* (2021) Antiviral activity of bacterial TIR domains via immune signalling molecules. *Nature*, **600**, 116–120.
- Guo, L., Sattler, L., Shafiqat, S., Graumann, P.L. and Bramkamp, M. (2022) A bacterial dynamin-like protein confers a novel phage resistance strategy on the population level in *Bacillus subtilis*. *Mbio*, **13**, e0375321.
- Ofir, G., Melamed, S., Sberro, H., Mukamel, Z., Silverman, S., Yaakov, G., Doron, S. and Sorek, R. (2018) DISARM is a widespread bacterial defence system with broad anti-phage activities. *Nat. Microbiol.*, **3**, 90–98.
- Garneau, J.E., Dupuis, M.E., Villion, M., Romero, D.A., Barrangou, R., Boyaval, P., Fremaux, C., Horvath, P., Magadan, A.H. and Moineau, S. (2010) The CRISPR/Cas bacterial immune system cleaves bacteriophage and plasmid DNA. *Nature*, **468**, 67–71.
- Swarts, D.C., Jore, M.M., Westra, E.R., Zhu, Y., Janssen, J.H., Snijders, A.P., Wang, Y., Patel, D.J., Berenguer, J., Brouns, S.J.J. *et al.* (2014) DNA-guided DNA interference by a prokaryotic Argonaute. *Nature*, **507**, 258–261.
- Böhm, K., Giacomelli, G., Schmidt, A., Imhof, A., Koszul, R., Marbouty, M. and Bramkamp, M. (2020) Chromosome organization by a conserved condensin-ParB system in the actinobacterium *Corynebacterium glutamicum*. *Nat. Commun.*, **11**, 1485.

14. Rybenkov, V.V., Herrera, V., Petrushenko, Z.M. and Zhao, H. (2014) MukBEF, a chromosomal organizer. *J. Mol. Microbiol. Biotechnol.*, **24**, 371–383.
15. Bürmann, F. and Gruber, S. (2015) SMC condensin: promoting cohesion of replication arms. *Nat. Struct. Mol. Biol.*, **22**, 653–655.
16. Palecek, J.J. and Gruber, S. (2015) Kite Proteins: a Superfamily of SMC/Kleisin Partners Conserved Across Bacteria, Archaea, and Eukaryotes. *Structure*, **23**, 2183–2190.
17. Gruber, S., Veening, J.W., Bach, J., Blettinger, M., Bramkamp, M. and Errington, J. (2014) Interlinked sister chromosomes arise in the absence of condensin during fast replication in *B. subtilis*. *Curr. Biol.*, **24**, 293–298.
18. Wang, X., Tang, O.W., Riley, E.P. and Rudner, D.Z. (2014) The SMC condensin complex is required for origin segregation in *Bacillus subtilis*. *Curr. Biol.*, **24**, 287–292.
19. Schibany, S., Kleine Borgmann, L.A.K., Rosch, T.C., Knust, T., Ulbrich, M.H. and Graumann, P.L. (2018) Single molecule tracking reveals that the bacterial SMC complex moves slowly relative to the diffusion of the chromosome. *Nucleic Acids Res.*, **46**, 7805–7819.
20. Yatskevich, S., Rhodes, J. and Nasmyth, K. (2019) Organization of chromosomal DNA by SMC complexes. *Annu. Rev. Genet.*, **53**, 445–482.
21. Marko, J.F., De Los Rios, P., Barducci, A. and Gruber, S. (2019) DNA-segment-capture model for loop extrusion by structural maintenance of chromosome (SMC) protein complexes. *Nucleic Acids Res.*, **47**, 6956–6972.
22. Petrushenko, Z.M., She, W. and Rybenkov, V.V. (2011) A new family of bacterial condensins. *Mol. Microbiol.*, **81**, 881–896.
23. Liyo, V.S., Junier, I., Lagage, V., Vallet, I. and Boccard, F. (2020) Distinct activities of bacterial condensins for chromosome management in *Pseudomonas aeruginosa*. *Cell Rep.*, **33**, 108344.
24. Panas, M.W., Jain, P., Yang, H., Mitra, S., Biswas, D., Wattam, A.R., Letvin, N.L. and Jacobs, W.R. Jr (2014) Noncanonical SMC protein in *Mycobacterium smegmatis* restricts maintenance of *Mycobacterium fortuitum* plasmids. *Proc. Natl. Acad. Sci. U.S.A.*, **111**, 13264–13271.
25. Bergerat, A., de Massy, B., Gadelle, D., Varoutas, P.C., Nicolas, A. and Forterre, P. (1997) An atypical topoisomerase II from Archaea with implications for meiotic recombination. *Nature*, **386**, 414–417.
26. Nichols, M.D., DeAngelis, K., Keck, J.L. and Berger, J.M. (1999) Structure and function of an archaeal topoisomerase VI subunit with homology to the meiotic recombination factor Spo11. *EMBO J.*, **18**, 6177–6188.
27. Hayama, R. and Mariani, K.J. (2010) Physical and functional interaction between the condensin MukB and the decatenase topoisomerase IV in *Escherichia coli*. *Proc. Natl. Acad. Sci. U.S.A.*, **107**, 18826–18831.
28. Li, Y., Stewart, N.K., Berger, A.J., Vos, S., Schoeffler, A.J., Berger, J.M., Chait, B.T. and Oakley, M.G. (2010) *Escherichia coli* condensin MukB stimulates topoisomerase IV activity by a direct physical interaction. *Proc. Natl. Acad. Sci. U.S.A.*, **107**, 18832–18837.
29. Zawadzki, P., Stracy, M., Ginda, K., Zawadzka, K., Lesterlin, C., Kapanidis, A.N. and Sherratt, D.J. (2015) The localization and action of topoisomerase IV in *Escherichia coli* chromosome segregation is coordinated by the SMC complex, MukBEF. *Cell Rep.*, **13**, 2587–2596.
30. Nicolas, E., Upton, A.L., Uphoff, S., Henry, O., Badrinarayanan, A. and Sherratt, D. (2014) The SMC complex MukBEF recruits topoisomerase IV to the origin of replication region in live *Escherichia coli*. *Mbio*, **5**, e01001-13.
31. Schäfer, A., Tauch, A., Jäger, W., Kalinowski, J., Thierbach, G. and Puhler, A. (1994) Small mobilizable multi-purpose cloning vectors derived from the *Escherichia coli* plasmids pK18 and pK19: selection of defined deletions in the chromosome of *Corynebacterium glutamicum*. *Gene*, **145**, 69–73.
32. Giacomelli, G., Feddersen, H., Peng, F., Martins, G.B., Grafemeyer, M., Meyer, F., Mayer, B., Graumann, P.L. and Bramkamp, M. (2022) Subcellular dynamics of a conserved bacterial polar scaffold protein. *Genes*, **13**, 278.
33. Rasmussen, R. (2001) In: Meuer, S., Wittwer, C. and Nakagawara, K.-I. (eds). *Rapid Cycle Real-Time PCR*. Springer Berlin Heidelberg, Berlin, Heidelberg, pp. 21–34.
34. Livak, K.J. and Schmittgen, T.D. (2001) Analysis of relative gene expression data using real-time quantitative PCR and the 2(-Delta Delta C(T)) Method. *Methods*, **25**, 402–408.
35. Studier, F.W. (2005) Protein production by auto-induction in high density shaking cultures. *Protein Expr Purif.*, **41**, 207–234.
36. Weber, P., Pissis, C., Navaza, R., Mechaly, A.E., Saul, F., Alzari, P.M. and Haouz, A. (2019) High-throughput crystallization pipeline at the crystallography core facility of the institut pasteur. *Molecules*, **24**, 4451.
37. Kabsch, W. (2010) XDS. *Acta. Crystallogr. D Biol. Crystallogr.*, **66**, 125–132.
38. Winn, M.D., Ballard, C.C., Cowtan, K.D., Dodson, E.J., Emsley, P., Evans, P.R., Keegan, R.M., Krissinel, E.B., Leslie, A.G., McCoy, A. et al. (2011) Overview of the CCP4 suite and current developments. *Acta. Crystallogr. D Biol. Crystallogr.*, **67**, 235–242.
39. Tickle, I.J., Flensburg, C., Keller, P., Paciorek, W., Sharff, A., Vornrhein, C. and Bricogne, G. (2016) In: *STARANISO*. Global Phasing Ltd. Cambridge, United Kingdom.
40. Emsley, P., Lohkamp, B., Scott, W.G. and Cowtan, K. (2010) Features and development of Coot. *Acta. Crystallogr. D Biol. Crystallogr.*, **66**, 486–501.
41. Liebschner, D., Afonine, P.V., Baker, M.L., Bunkoczi, G., Chen, V.B., Croll, T.I., Hintze, B., Hung, L.W., Jain, S., McCoy, A.J. et al. (2019) Macromolecular structure determination using X-rays, neutrons and electrons: recent developments in Phenix. *Acta Crystallogr. D Struct. Biol.*, **75**, 861–877.
42. Smart, O.S., Womack, T.O., Flensburg, C., Keller, P., Paciorek, W., Sharff, A., Vornrhein, C. and Bricogne, G. (2012) Exploiting structure similarity in refinement: automated NCS and target-structure restraints in BUSTER. *Acta. Crystallogr. D Biol. Crystallogr.*, **68**, 368–380.
43. Goddard, T.D., Huang, C.C., Meng, E.C., Pettersen, E.F., Couch, G.S., Morris, J.H. and Ferrin, T.E. (2018) UCSF ChimeraX: meeting modern challenges in visualization and analysis. *Protein Sci.*, **27**, 14–25.
44. Jumper, J., Evans, R., Pritzel, A., Green, T., Figurnov, M., Ronneberger, O., Tunyasuvunakool, K., Bates, R., Zidek, A., Potapenko, A. et al. (2021) Highly accurate protein structure prediction with AlphaFold. *Nature*, **596**, 583–589.
45. Holm, L. (2022) Dali server: structural unification of protein families. *Nucleic Acids Res.*, **50**, W210–W215.
46. Xiong, X., Wu, G., Wei, Y., Liu, L., Zhang, Y., Su, R., Jiang, X., Li, M., Gao, H., Tian, X. et al. (2020) SspABCD-SspE is a phosphorothioation-sensing bacterial defence system with broad anti-phage activities. *Nat Microbiol.*, **5**, 917–928.
47. R Studio Team (2021) In: *RStudio: Integrated Development Environment for R*. RStudio, Inc. Boston, MA.
48. Core Team, R (2021) In: *R: A language and environment for statistical computing R Foundation for Statistical Computing*. Vienna, Austria.
49. Wickham, H. (2016) In: *ggplot2: Elegant Graphics for Data Analysis*. Springer-Verlag NY.
50. Schindelin, J., Arganda-Carreras, I., Frise, E., Kaynig, V., Longair, M., Pietzsch, T., Preibisch, S., Rueden, C., Saalfeld, S., Schmid, B. et al. (2012) Fiji: an open-source platform for biological-image analysis. *Nat. Methods*, **9**, 676–682.
51. Ducret, A., Quardokus, E.M. and Brun, Y.V. (2016) MicrobeJ, a tool for high throughput bacterial cell detection and quantitative analysis. *Nat Microbiol.*, **1**, 16077.
52. Tinevez, J.Y., Perry, N., Schindelin, J., Hoopes, G.M., Reynolds, G.D., Laplantine, E., Bednarek, S.Y., Shorte, S.L. and Eliceiri, K.W. (2017) TrackMate: an open and extensible platform for single-particle tracking. *Methods*, **115**, 80–90.
53. Hernández-Tamayo, R., Schmitz, H. and Graumann, P.L. (2021) Single-molecule dynamics at a bacterial replication fork after nutritional downshift or chemically induced block in replication. *Msphere*, **6**, e00948-20.
54. Rosch, T.C., Oviedo-Bocanegra, L.M., Fritz, G. and Graumann, P.L. (2018) SMTracker: a tool for quantitative analysis, exploration and visualization of single-molecule tracking data reveals highly dynamic binding of *B. subtilis* global repressor AbrB throughout the genome. *Sci. Rep.*, **8**, 15747.
55. Schütz, G.J., Schindler, H. and Schmidt, T. (1997) Single-molecule microscopy on model membranes reveals anomalous diffusion. *Biophys. J.*, **73**, 1073–1080.
56. Oviedo-Bocanegra, L.M., Hinrichs, R., Rotter, D.A.O., Dersch, S. and Graumann, P.L. (2021) Single molecule/particle tracking analysis program SMTracker 2.0 reveals different dynamics of proteins within

- the RNA degradosome complex in *Bacillus subtilis*. *Nucleic Acids Res.*, **49**, e112.
57. Letunic, I., Doerks, T. and Bork, P. (2015) SMART: recent updates, new developments and status in 2015. *Nucleic Acids Res.*, **43**, D257–D260.
  58. Takahashi, T.S., Da Cunha, V., Krupovic, M., Mayer, C., Forterre, P. and Gabelle, D. (2020) Expanding the type IIB DNA topoisomerase family: identification of new topoisomerase and topoisomerase-like proteins in mobile genetic elements. *NAR Genom Bioinform*, **2**, lqz021.
  59. Dewese, J.E. and Osheroff, N. (2009) The DNA cleavage reaction of topoisomerase II: wolf in sheep's clothing. *Nucleic Acids Res.*, **37**, 738–748.
  60. Berger, J.M., Gamblin, S.J., Harrison, S.C. and Wang, J.C. (1996) Structure and mechanism of DNA topoisomerase II. *Nature*, **379**, 225–232.
  61. Rawdon, E.J., Dorier, J., Racko, D., Millett, K.C. and Stasiak, A. (2016) How topoisomerase IV can efficiently unknot and decatenate negatively supercoiled DNA molecules without causing their torsional relaxation. *Nucleic Acids Res.*, **44**, 4528–4538.
  62. Hirsch, J. and Klostermeier, D. (2021) What makes a type IIA topoisomerase a gyrase or a Topo IV? *Nucleic Acids Res.*, **49**, 6027–6042.
  63. Deep, A., Gu, Y., Gao, Y.Q., Ego, K.M., Herzik, M.A. Jr, Zhou, H. and Corbett, K.D. (2022) The SMC-family Wadjet complex protects bacteria from plasmid transformation by recognition and cleavage of closed-circular DNA. *Mol. Cell*, **82**, 4145–4159.
  64. Kleine Borgmann, L.A. and Graumann, P.L. (2014) Structural maintenance of chromosome complex in bacteria. *J. Mol. Microbiol. Biotechnol.*, **24**, 384–395.
  65. Rybenkov, V.V. (2014) Maintenance of chromosome structure in *Pseudomonas aeruginosa*. *FEMS Microbiol. Lett.*, **356**, 154–165.
  66. Zawadzka, K., Zawadzki, P., Baker, R., Rajasekar, K.V., Wagner, F., Sherratt, D.J. and Arciszewska, L.K. (2018) MukB ATPases are regulated independently by the N- and C-terminal domains of MukF kleisin. *Elife*, **7**, e31522.
  67. Bürmann, F., Funke, L.F.H., Chin, J.W. and Lowe, J. (2021) Cryo-EM structure of MukBEF reveals DNA loop entrapment at chromosomal unloading sites. *Mol. Cell*, **81**, 4891–4906.
  68. Bürmann, F., Lee, B.G., Than, T., Sinn, L., O'Reilly, F.J., Yatskevich, S., Rappsilber, J., Hu, B., Nasmyth, K. and Lowe, J. (2019) A folded conformation of MukBEF and cohesin. *Nat. Struct. Mol. Biol.*, **26**, 227–236.
  69. Hassler, M., Shaltiel, I.A. and Haering, C.H. (2018) Towards a unified model of SMC complex function. *Curr. Biol.*, **28**, R1266–R1281.
  70. Shaltiel, I.A., Datta, S., Lecomte, L., Hassler, M., Kschonsak, M., Bravo, S., Stober, C., Ormanns, J., Eustermann, S. and Haering, C.H. (2022) A hold-and-feed mechanism drives directional DNA loop extrusion by condensin. *Science*, **376**, 1087–1094.
  71. Higashi, T.L., Pobegalov, G., Tang, M., Molodtsov, M.I. and Uhlmann, F. (2021) A Brownian ratchet model for DNA loop extrusion by the cohesin complex. *Elife*, **10**, e67530.
  72. Ganji, M., Shaltiel, I.A., Bisht, S., Kim, E., Kalichava, A., Haering, C.H. and Dekker, C. (2018) Real-time imaging of DNA loop extrusion by condensin. *Science*, **360**, 102–105.
  73. Hirano, M., Anderson, D.E., Erickson, H.P. and Hirano, T. (2001) Bimodal activation of SMC ATPase by intra- and inter-molecular interactions. *EMBO J.*, **20**, 3238–3250.
  74. Bahng, S., Kumar, R. and Mariani, K.J. (2022) Intersubunit and intrasubunit interactions driving the MukBEF ATPase. *J. Biol. Chem.*, **298**, 101964.
  75. Bax, B.D., Chan, P.F., Eggleston, D.S., Fosberry, A., Gentry, D.R., Gorrec, F., Giordano, I., Hann, M.M., Hennessy, A., Hibbs, M. *et al.* (2010) Type IIA topoisomerase inhibition by a new class of antibacterial agents. *Nature*, **466**, 935–940.
  76. Liu, H.W., Roisne-Hamelin, F., Beckert, B., Li, Y., Myasnikov, A. and Gruber, S. (2022) DNA-measuring Wadjet SMC ATPases restrict smaller circular plasmids by DNA cleavage. *Mol. Cell*, **82**, 4727–4740.
  77. Kumar, R., Bahng, S. and Mariani, K.J. (2022) The MukB-topoisomerase IV interaction mutually suppresses their catalytic activities. *Nucleic Acids Res.*, **50**, 2621–2634.
  78. Fisher, G.L., Bolla, J.R., Rajasekar, K.V., Makela, J., Baker, R., Zhou, M., Prince, J.P., Stracy, M., Robinson, C.V., Arciszewska, L.K. *et al.* (2021) Competitive binding of MatP and topoisomerase IV to the MukB hinge domain. *Elife*, **10**, e70444.
  79. Diebold-Durand, M.L., Lee, H., Ruiz Avila, L.B., Noh, H., Shin, H.C., Im, H., Bock, F.P., Bürmann, F., Durand, A., Basfeld, A. *et al.* (2017) Structure of Full-Length SMC and Rearrangements Required for Chromosome Organization. *Mol. Cell*, **67**, 334–347.
  80. Donovan, C., Sieger, B., Kramer, R. and Bramkamp, M. (2012) A synthetic *Escherichia coli* system identifies a conserved origin tethering factor in Actinobacteria. *Mol. Microbiol.*, **84**, 105–116.
